# Supplementary material for: Microwave-assisted preparation of nucleoside-phosphoramidites
Source: Royal Society of Chemistry journal article supplement (doi:10.1039/c4cc03092c), 2014-01-01
Supplement: c4cc03092c1.pdf [file c4cc03092c1.pdf]

## Supporting Information

### Microwave-Assisted Preparation of Nucleoside-Phosphoramidites

G. Meher, T. Efthymiou, M. Stoop, and R. Krishnamurthy\*

#### Experimental

**Materials & Methods:** Anhydrous  $\text{CH}_2\text{Cl}_2$  was purchased from EMD chemicals and stored over  $4\text{\AA}$  molecular sieves, prior to use. Anhydrous toluene was obtained from Alfa Aesar and used as received.  $(i\text{Pr})_2\text{EtN}$  (Hünig's base) was obtained from Sigma-Aldrich. All protected DNA and RNA monomers were obtained from Chem-Impex International, Inc. and used as received. 2-cyanoethyl- $N,N$ -diisopropyl chlorophosphoramidite **5** was obtained from Rasayn Inc. 2-cyanoethyl- $N,N,N',N'$ -tetraisopropyl phosphorodiamidite **6** was obtained from ChemGenes Corporation. Pre-coated flexible silica gel TLC F254 plates were obtained from Whatman Ltd. Flash column chromatography was performed using silica gel 60 (40–60  $\mu\text{m}$ ) from Fisher Scientific.  $^1\text{H}$  NMRs were recorded in parts per million (ppm) using Bruker DRX-600 at 600 MHz for proton referenced to  $\text{CDCl}_3$  at 7.26 ppm.  $^{13}\text{C}$  NMRs were recorded using Bruker DRX-600 equipped with a 5 mm DCH cryoprobe at 150 MHz for carbon referenced to  $\text{CDCl}_3$  at 77.23 ppm.  $^{31}\text{P}$  NMR chemical shifts were recorded in ppm relative to an external probe (85%  $\text{H}_3\text{PO}_4$ ) referenced at 0.0 ppm. Mass analysis was performed using Agilent ESI-TOF mass spectrometer at an ESI voltage of 4000V and a flow rate of 200  $\mu\text{L}/\text{minute}$ . Microwave assisted synthesis was performed on a Microwave synthesizer Biotage *initiator EXP US* (in K. B. Sharpless lab at TSRI).

**Table S1.** Phosphitylation attempts on ribulose-thymidine derivative **3** with reagents **5** or **6**.

| Entry | Reagent            | Activator                                        | Base         | Conditions | Observations                                                      |
|-------|--------------------|--------------------------------------------------|--------------|------------|-------------------------------------------------------------------|
| 1.    | <b>5</b> (1.5 eq.) | -                                                | Hünig's base | rt, 18 h   | Product with a lot of SM (TLC)                                    |
| 2.    | <b>5</b> (1.5 eq.) | -                                                | Hünig's base | rt, 48 h   | Multiple peaks ( $^{31}\text{P}$ NMR)                             |
| 3.    | <b>5</b> (4 eq.)   | -                                                | DBU          | rt, 6–20 h | Two new & clean spots; does not correspond to the product. (TLC). |
| 4.    | <b>6</b> (3 eq.)   | 5-Ethylthiotetrazole                             | -            | rt, 28 h   | Product spot together with a lot of SM (TLC)                      |
| 5.    | <b>6</b> (3 eq.)   | Imidazolium triflate                             | -            | rt, 28 h   | Very faint product spot (TLC)                                     |
| 6.    | <b>6</b> (3 eq.)   | Benzimidazolium triflate                         | -            | rt, 28 h   | Very faint product spot (TLC)                                     |
| 7.    | <b>6</b> (3 eq.)   | Dicyanoimidazole                                 | -            | rt, 18 h   | Very faint product spot (TLC)                                     |
| 8.    | <b>6</b> (3 eq.)   | $N,N,N',N'$ -tetraisopropyl-ammonium tetrazolide | -            | rt, 18 h   | No product (TLC)                                                  |

4'-O-benzoyl-1'-O-(4,4'-dimethoxytrityl)- $\beta$ -L-ribofuranosylthymine-2'-[(2-cyanoethyl)-(N,N-diisopropyl)]-phosphoramidite (7):

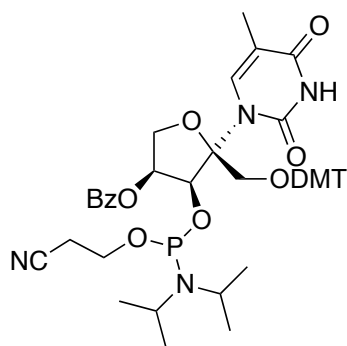

4'-O-benzoyl-1'-O-(4,4'-dimethoxytrityl)- $\beta$ -L-ribofuranosylthymine **3** (0.318 g, 0.48 mmol) was azeotroped with anhydrous toluene (3 x 20 mL) and dried under high vacuum overnight. It was further dissolved in 5 mL of anhydrous CH<sub>2</sub>Cl<sub>2</sub>, followed by the addition of (iPr)<sub>2</sub>EtN (0.47 mL, 2.87 mmol) under argon atmosphere. The solution was cooled to 0 °C, followed by the addition of 2-cyanoethyl-N,N-diisopropyl chlorophosphoramidite **5** (0.21 mL, 0.95 mmol). The reaction mixture was brought to room temperature and stirred overnight. The reaction mixture was quenched by the addition of saturated aq.

NaHCO<sub>3</sub> (5 mL) solution, extracted with CH<sub>2</sub>Cl<sub>2</sub> (3 x 50 mL), washed with water (20 mL) followed by brine (50 mL). The combined organic extract was dried over anhydrous MgSO<sub>4</sub>, filtered, concentrated *in vacuo*, and the residue was purified by silica gel column chromatography (30% EtOAc/hexanes containing 2% Et<sub>3</sub>N) to afford 0.144 g (35%) of phosphoramidite **7** (containing traces of H-phosphonate) as a mixture of diastereomers. R<sub>f</sub>, 0.40, 0.55 (60% EtOAc/hexanes); <sup>1</sup>H NMR (600 MHz, CDCl<sub>3</sub>,  $\delta$  (ppm)): 0.80–1.11 (m, 12 H), 2.00–2.11(m, 3H), 2.35–2.35 (m, 1H), 2.42–2.62 (m, 1H), 3.42–3.80 (m, 11H), 4.42–4.44 (m, 2H), 5.25–5.40 (m, 1H), 6.75–6.85 (m, 4H), 7.10–7.45 (m, 15H), 7.55–7.65 (m, 1H), 7.80 (s, 1H), 7.95–8.05 (m, 2H); <sup>31</sup>P NMR (243 MHz, CDCl<sub>3</sub>,  $\delta$  (ppm)): 153.1, 152.3. HRMS (ESI-TOF high-acc) calcd for C<sub>47</sub>H<sub>53</sub>N<sub>4</sub>O<sub>10</sub>PSi (M+H)<sup>+</sup>: 865.3572, found: 865.3589.

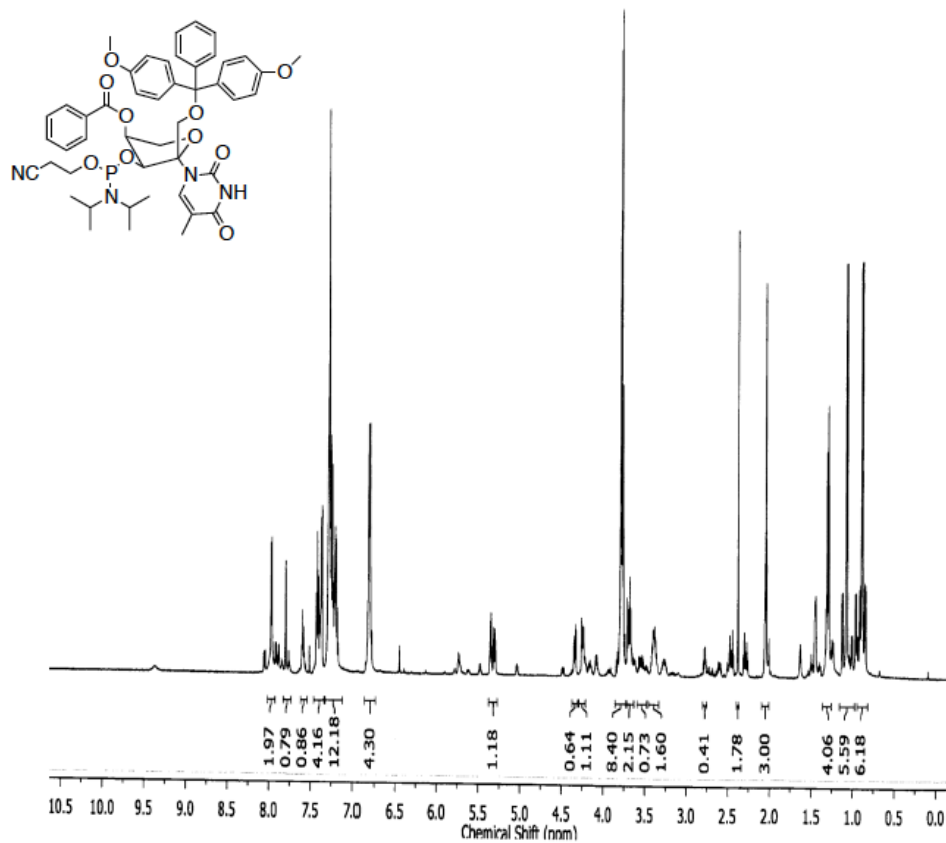

Figure S1.  $^1\text{H}$  NMR of protected  $\beta$ -L-ribulo-T-phosphoramidite derivative 7 in CDCl<sub>3</sub>

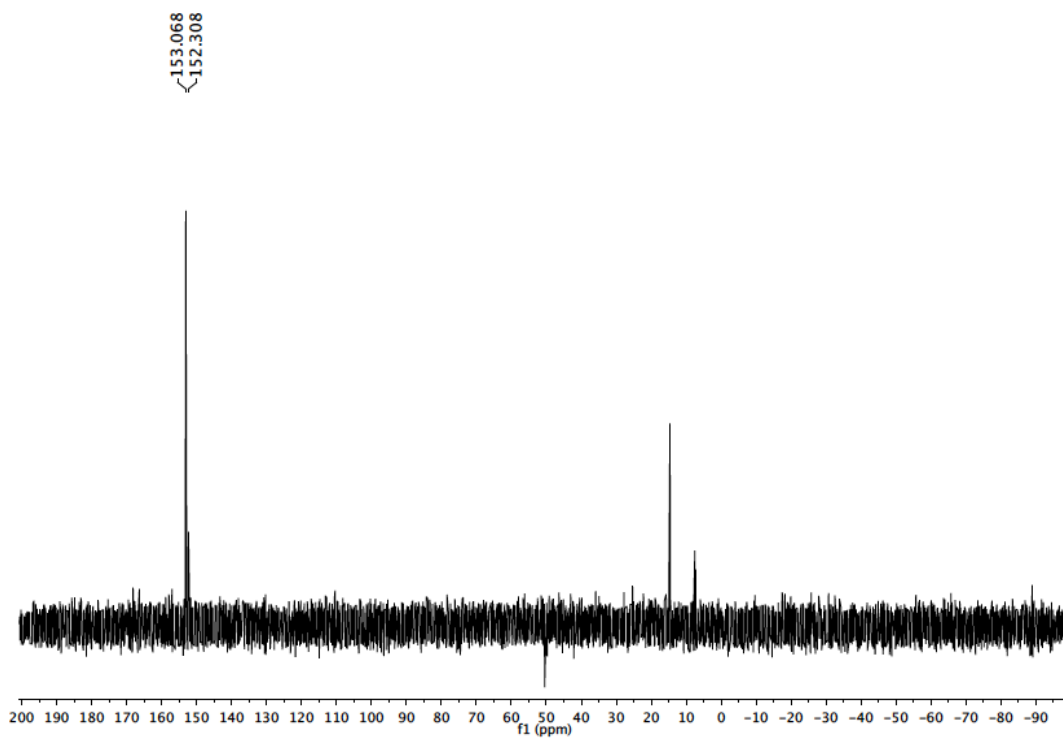

Figure S2.  $^{31}\text{P}$  NMR of protected L-ribulo-T-phosphoramidite 7 in CDCl<sub>3</sub>

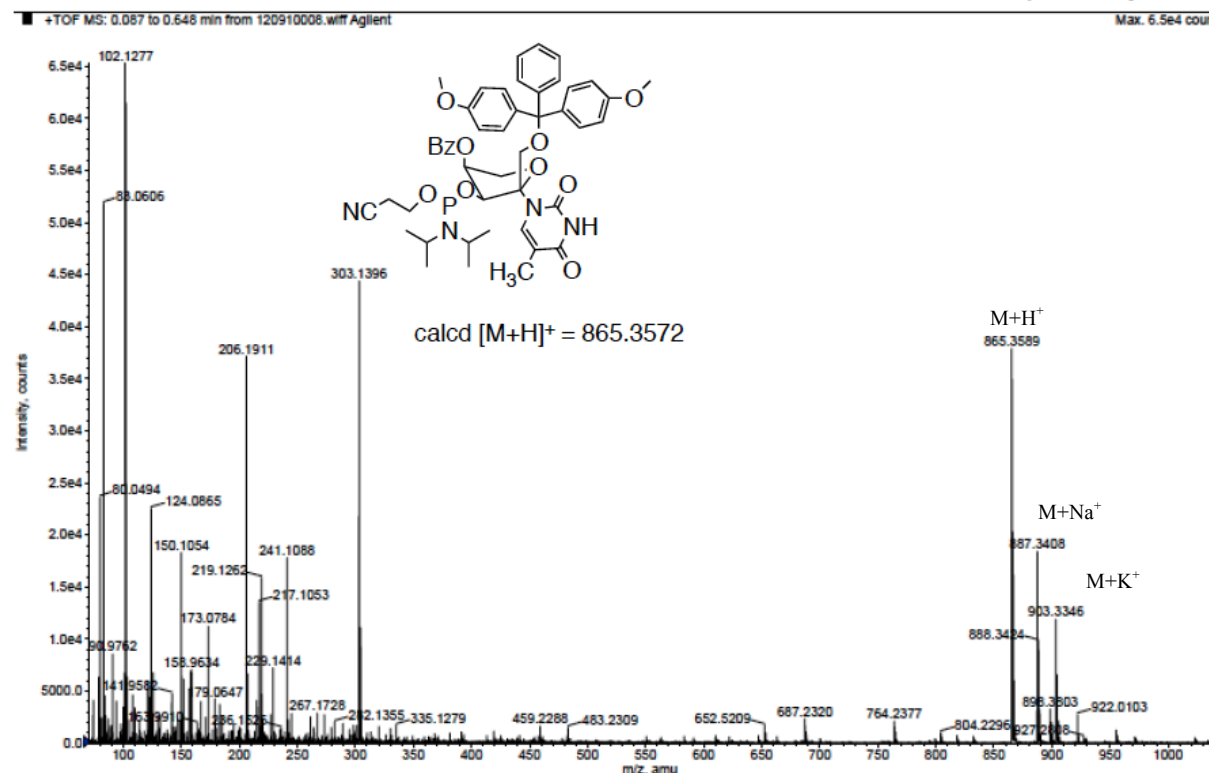

Figure S3. HRMS (ESI-TOF high-accu) of protected L-ribulo-T-phosphoramidite 7

*1'-O-(4,4'-dimethoxytrityl)-4'-O-tri-isopropylsilyloxymethyl-β-L-ribulofuranosylthymine-3'-O-[O-(2-cyanoethyl)-(N,N-diisopropyl)]-phosphoramidite* (**8**): *1'*-dimethoxytrityl-4'-O-tri-isopropylsilyloxymethyl-L-ribulofuranosylthymine **4** (0.550 g, 0.74 mmol) was azeotroped with anhydrous toluene (3 x 20 mL), dried under high vacuum overnight, and dissolved in 3 mL of anhydrous  $CH_2Cl_2$ , followed by the addition of  $(iPr)_2EtN$  (0.48 mL, 2.96 mmol) under argon atmosphere. The resulting solution was transferred to a microwave tube (2–5 mL) containing

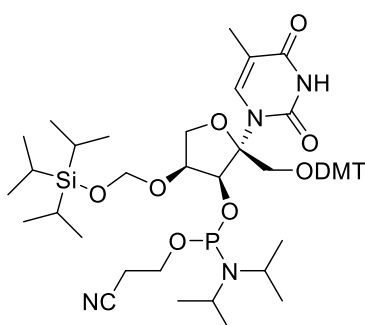

2-cyanoethyl-*N,N*-diisopropyl chlorophosphoramidite **5** (0.33 mL, 1.48 mmol). Microwave tube was sealed and irradiated at 65 °C for 20 min. The reaction mixture was quenched by the addition of saturated aq.  $NaHCO_3$  (5 mL) solution, extracted with  $CH_2Cl_2$  (3 x 50 mL), washed with water (20 mL) followed by brine (50 mL), and the combined organic extract was dried over anhydrous  $MgSO_4$ , filtered and concentrated *in vacuo*. The residue was purified by silica gel column chromatography (30% EtOAc/hexanes containing 2%  $Et_3N$ ) to afford 0.526 g (75%) of pure phosphoramidite **8** as a white amorphous solid (mixture of diastereomers in ratio of 2:1). **8**:  $R_f$ , 0.61 and 0.54 (20%  $Et_2O/CH_2Cl_2$ );  $R_f$ : 0.62 and 0.42 (45% EtOAc/hexanes);  $^1H$  NMR (600 MHz,  $CDCl_3$   $\delta$  (ppm)): 0.90–1.20 (m, 33H,  $Si(CH_2CH_3)_3$ ,  $Si(CH_2CH_3)_3$  and  $N(CH_2CH_3)_2$ ), 1.98 and 2.03 (2s, 3H,  $CH_3(C-5)$ ), 2.14–2.57 (m, 2H,

OCH<sub>2</sub>CH<sub>2</sub>CN), 3.34–3.50 (m, 2H, 2 Me<sub>2</sub>CH), 3.53–4.28 (m, 13 H, H-1', H-1'', 2 OCH<sub>3</sub>, H-5', H-5'', H-4' and OCH<sub>2</sub>CH<sub>2</sub>CN), 4.82, 4.87 (2d, *J* = 4.8, 5.4 Hz, 1H, OCH<sub>2</sub>O), 4.95, 5.00 (2d, *J* = 5.4, 4.8 Hz, 1H, OCH<sub>2</sub>O), 5.04, 5.16 (2dd, *J* = 10.8, 4.8 Hz and *J* = 11.4, 5.4 Hz, H-3'), 6.66–6.86 (m, 4H, arom.), 7.15–7.33 (m, 9H, arom.), 7.69–7.76 (m, 1H, H-6), 7.84 (brs, 1H, NH). <sup>13</sup>C NMR (150 MHz, CDCl<sub>3</sub>): 12.1, 12.1 (CH<sub>3</sub>-C5) 12.8, 12.9, 18.0, 18.0 (Si(CH<sub>2</sub>CH<sub>3</sub>)<sub>3</sub>), 19.9, 19.9 (Si(CH<sub>2</sub>CH<sub>3</sub>)<sub>3</sub>), 20.5, 20.5 (CH<sub>2</sub>CN), 24.4, 24.5, 24.6, 24.7, 24.9 (NCH(CH<sub>3</sub>)<sub>2</sub>), 43.4, 43.4, 43.6, 43.7 (NCH(CH<sub>3</sub>)<sub>2</sub>), 55.4, 55.4 (OCH<sub>3</sub>), 58.6, 58.8, 58.9 (OCH<sub>2</sub>CH<sub>2</sub>CN), 63.1, 63.5 (C-1'), 70.2, 70.7 (C-5'), 74.8, 75.0, 75.1, 76.3 (C-3'/C-4'), 86.1, 86.2 (quaternary C-DMTr), 89.8, 90.1 (OCH<sub>2</sub>O), 99.8, 99.9 (C-2'), 100.1, 100.2, 108.9, 109.3 (C-5), 113.2, 113.2, 113.2, 113.3 (arom.), 117.8, 117.9 (CN), 127.0, 127.9, 128.2, 128.3, 130.1, 130.1, 130.2, 130.2, 135.9, 135.9, 136.1 (arom.), 137.7, 138.0 (C-6), 144.8, 144.9, 149.8, 149.8 (C-2) (only 1 of each on carbon spectrum), 158.6, 158.6 (arom.) 164.1, 164.2 (C-4); <sup>31</sup>P NMR (243 MHz, CDCl<sub>3</sub> δ (ppm)): 152.5, 152.7; HRMS (ESI-TOF high-acc) calcd for C<sub>50</sub>H<sub>71</sub>N<sub>4</sub>O<sub>10</sub>PSi (M+H)<sup>+</sup>: 947.4750, found: 947.4750.

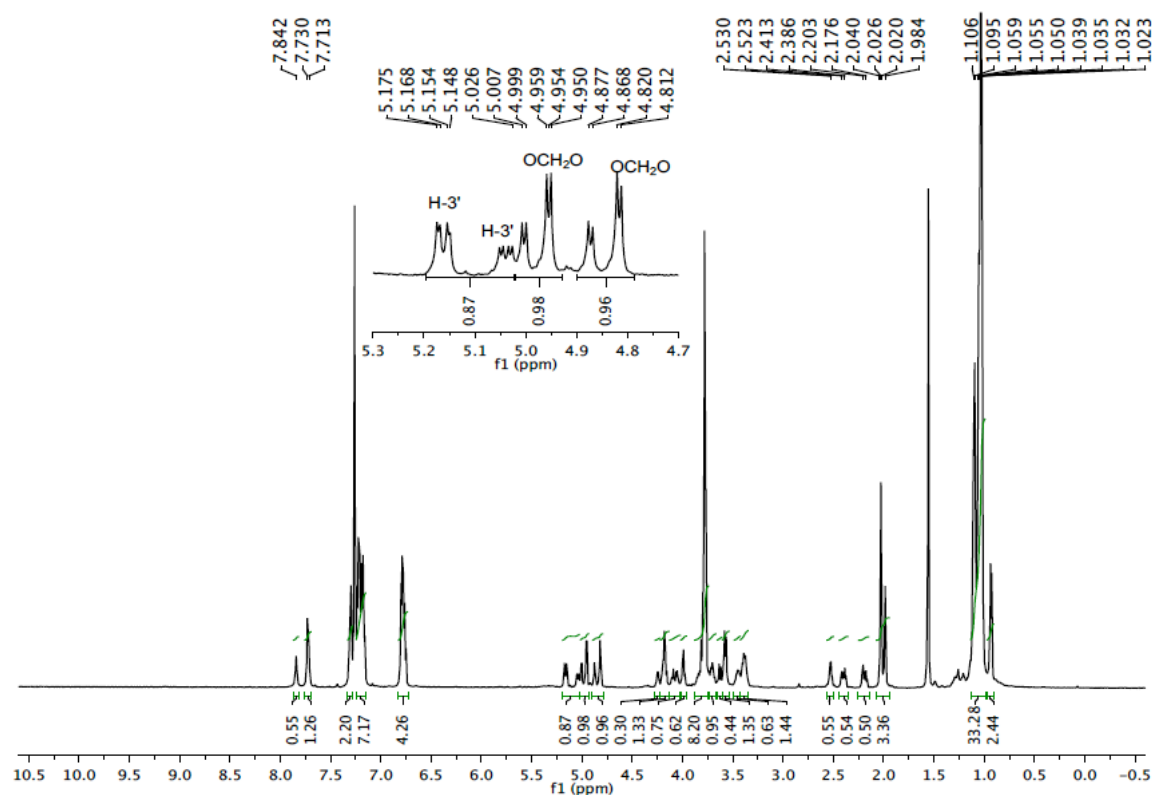

Figure S4. <sup>1</sup>H NMR of protected β-L-ribulose-5-phosphoramidite **8** in CDCl<sub>3</sub>

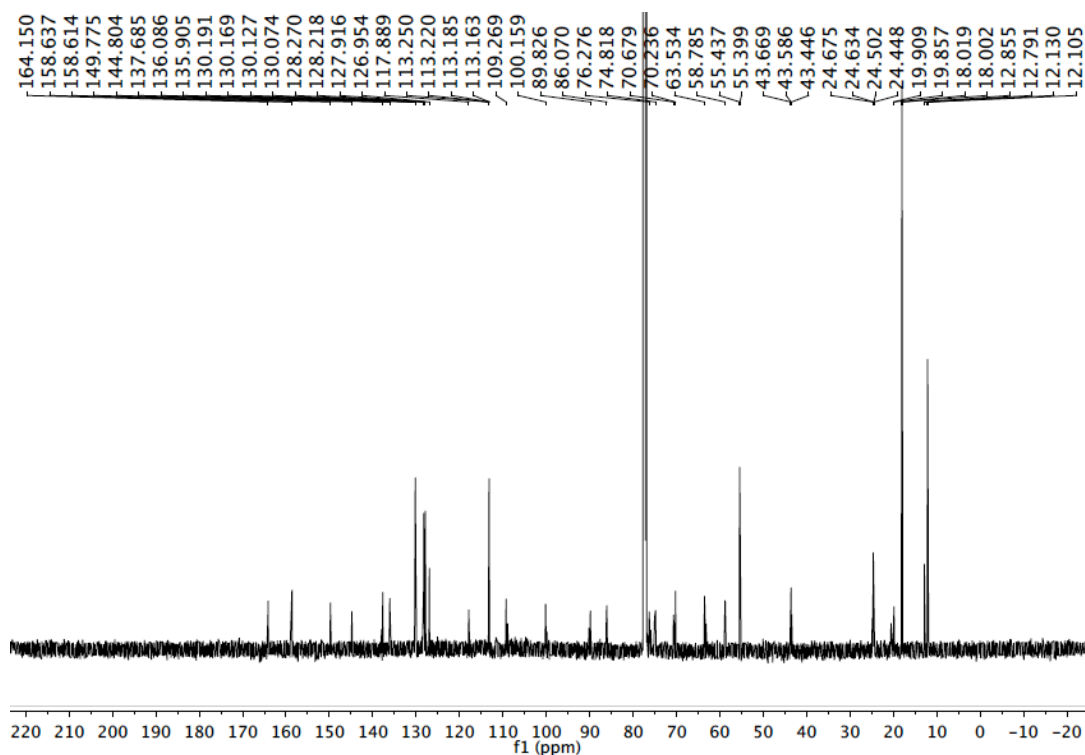

**Figure S5.**  $^{13}\text{C}$  NMR of protected- $\beta$ -L-ribulo-T-phosphoramidite **8** in  $\text{CDCl}_3$

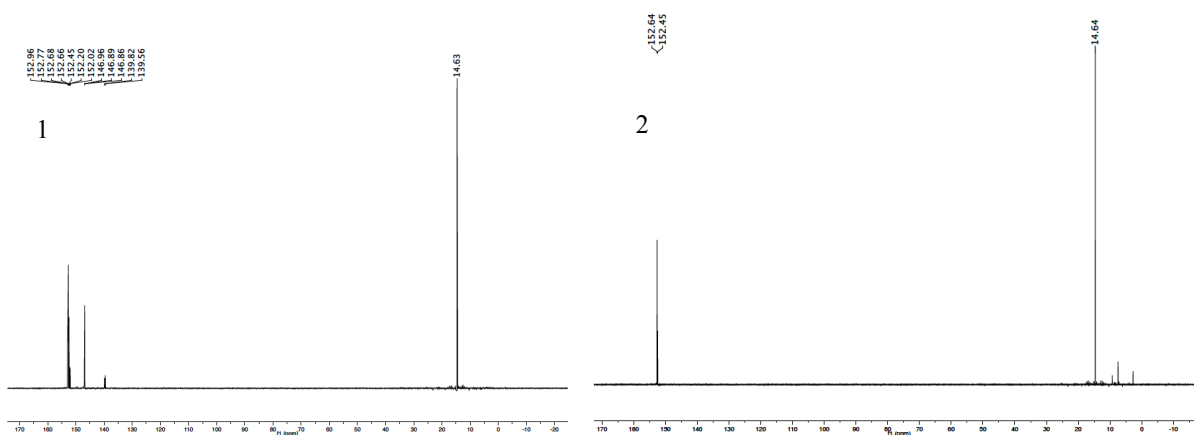

**Figure S6a.**  $^{31}\text{P}$  NMR in  $\text{CDCl}_3$  of (1) the crude reaction mixture (containing **8**) after work-up and (2) crude reaction mixture (containing **8**) after precipitation from  $\text{CH}_2\text{Cl}_2$ /hexanes. The presence of the excess reagent **5** resulted in the corresponding H-phosphonate (derived from **5**) after work-up. While attempts to remove H-phosphonate from the crude product by dissolving in minimum amount of  $\text{CH}_2\text{Cl}_2$  and precipitating in hexanes were unsuccessful, other side products came out of solution as a sticky liquid. The solution was decanted and concentrated; the resulting residue, which showed a clean  $^{31}\text{P}$  NMR (peaks at 152.7 and 152.4 ppm for product **8** and 14 ppm for H-phosphonate, Figure S6a-2), was further purified by short silica gel column chromatography to afford 75% yield of pure **8** free of H-phosphonate (Figure S6b).

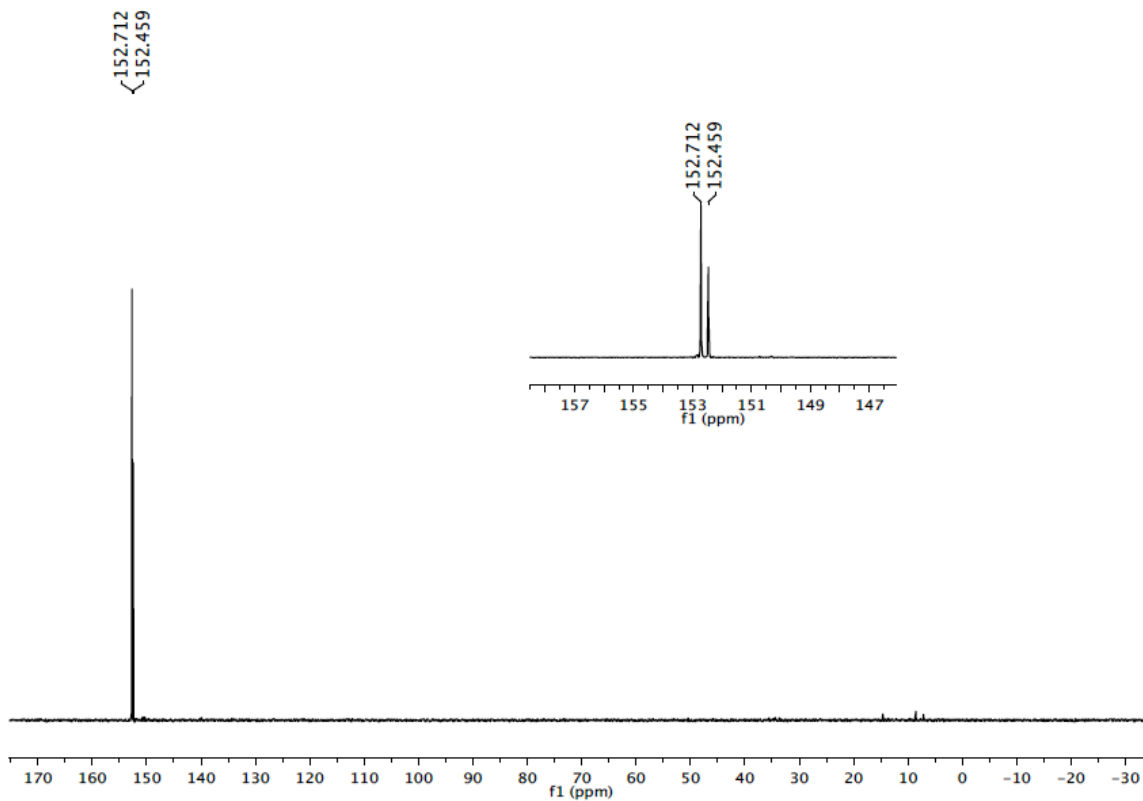

Figure S6b. <sup>31</sup>P NMR of protected-β-L-ribuloT-phosphoramidite **8** in CDCl<sub>3</sub>

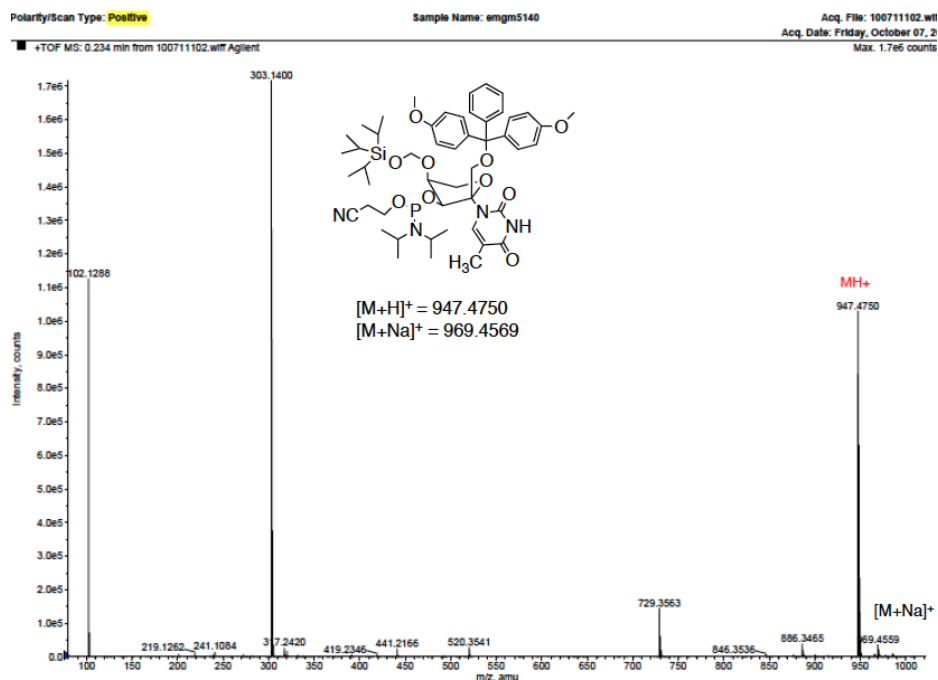

Figure S7. HRMS (ESI-TOF high-accu) of protected-β-L-ribuloT-phosphoramidite **8**

*N*6-benzoyl-1'-*O*-dimethoxytrityl-4'-*O*-triisopropylsilyloxymethyl- $\beta$ -*L*-ribofuranosyl-adenine-3'-[(2-cyanoethyl)-(*N,N*-diisopropyl)]-phosphoramidite (**12**):

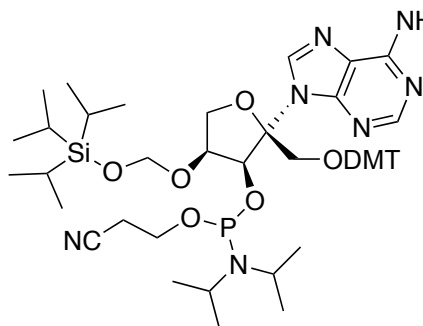

mg, 0.35 mmol) was dried by coevaporation with toluene (3 x 20 mL) and further dissolved in anhydrous CH<sub>2</sub>Cl<sub>2</sub> (2.57 mL), followed by the addition of (*i*Pr)<sub>2</sub>EtN (238  $\mu$ L, 1.40 mmol, 4 eq.). 2-cyanoethyl-*N,N*-diisopropyl chlorophosphoramidite **5** (157  $\mu$ L, 0.70 mmol, 2.0 eq.) was added to the stirred solution and irradiated in a microwave reactor at 65 °C for 1 h. The reaction mixture was cooled to 0 °C and quenched by the addition of saturated aqueous NaHCO<sub>3</sub> (3 mL) solution. The reaction mixture was partitioned between CH<sub>2</sub>Cl<sub>2</sub> (50 mL) and saturated aqueous NaHCO<sub>3</sub> (30 mL). Then, the aqueous layer was extracted with CH<sub>2</sub>Cl<sub>2</sub> (3 x 50 mL). The organic extracts were combined and washed with brine (20 mL) and dried over anhydrous MgSO<sub>4</sub>, filtered and concentrated *in vacuo*. The crude product was purified by silica gel flash column chromatography (hexanes/EtOAc 2:1 (2% Et<sub>3</sub>N)  $\rightarrow$  hexanes/EtOAc 3:2 (2% Et<sub>3</sub>N)) to afford compound **12** as a white foam (256 mg, 0.24 mmol, 69% yield). **12**: R<sub>f</sub>: 0.44 (hexanes/EtOAc 2:1). <sup>1</sup>H NMR (600 MHz, CDCl<sub>3</sub>,  $\delta$  (ppm)): 0.93–1.06 (*m*, 29H), 1.11–1.13 (*m*, 6H), 2.28–2.44 (*m*, 1H), 2.55–2.56 (*m*, 1H), 3.41–3.50 (*m*, 2H), 3.62–3.65 (*m*, 1H), 3.75–3.76 (*m*, 6H, 2 x OMe (DMT)), 3.79–4.29 (*m*, 5H), 4.46–4.51 (*m*, 1H), 4.76–4.81 (*2d*, *J* = 5.1, 5.0 Hz, 1H (2 diastereomers)), 4.92–4.96 (*2d*, *J* = 5.0, 5.1 Hz, 1H (2 diastereomers)), 5.45–5.51 (*m*, 1H), 6.64–6.72 (*m*, 4H), 7.01–7.20 (*m*, 9H), 7.52–7.55 (*m*, 2H), 7.60–7.61 (*m*, 1H), 8.03–8.06 (*m*, 2H), 8.33–8.40 (*m*, 1H), 8.55–8.61 (*m*, 1H), 9.04–9.07 (*m*, 1H); <sup>13</sup>C NMR (150 MHz, CDCl<sub>3</sub>,  $\delta$  (ppm)): 12.0, 12.0, 17.9, 17.9, 17.9, 20.4, 20.4, 20.5, 24.4, 24.5, 24.5, 24.6, 24.6, 24.8, 24.8, 43.3, 43.5, 55.3, 59.0, 59.2, 63.4, 64.2, 71.4, 75.8, 86.1 (2*s*, quaternary C (DMT) (2 diastereomers)), 86.2, 89.8 (2*t*, OCH<sub>2</sub>O (2 diastereomers)), 89.9, 98.4 (2*s*, C2' (2 diastereomers)), 98.6, 113.0 (arom. C (DMT)), 113.1, 113.1, 117.6 (2*s*, CN (2 diastereomers)), 117.7, 123.9 (arom. C), 126.8, 126.8, 127.8, 127.8, 128.0, 128.0, 128.1, 129.0, 129.8, 130.0, 130.0, 132.9, 132.9, 133.9, 133.9, 135.3, 135.7, 135.7, 142.9, 143.1, 144.3, 144.4, 149.2, 149.4, 150.5, 150.6, 151.9, 151.9, 158.5, 158.5, 164.6 (*s*, CO (Bz)); <sup>31</sup>P NMR (243 MHz, CDCl<sub>3</sub>,  $\delta$  (ppm)): 153.15, 153.31; HRMS (ESI-TOF high-acc.): calcd 1060.5127 ([M+H]<sup>+</sup>); found 1060.5127 ([M+H]<sup>+</sup>).





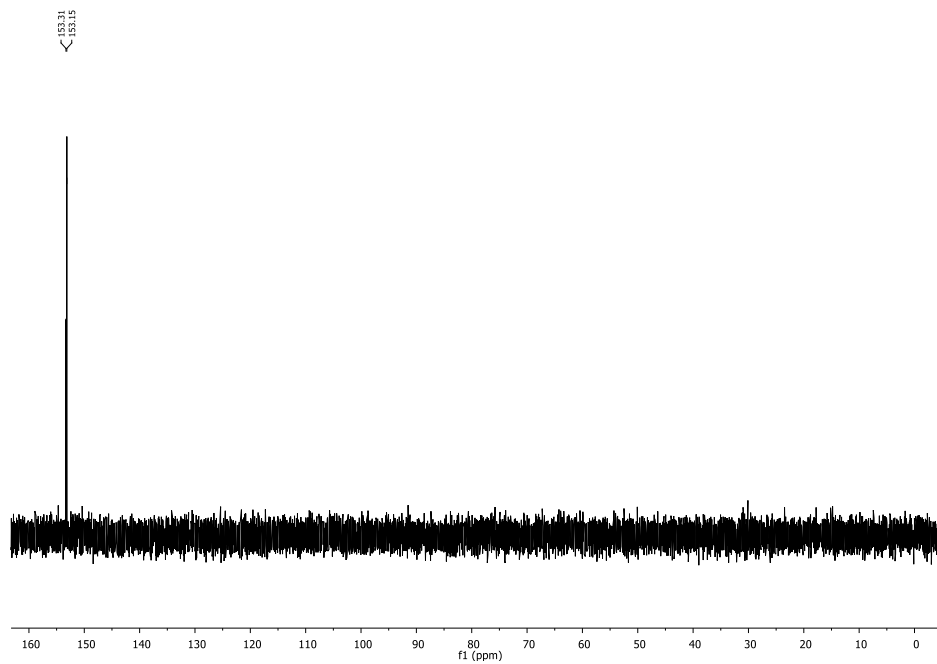

**Figure S10.**  $^{31}\text{P}$  NMR of **12** in  $\text{CDCl}_3$

*N*4-benzoyl-1'-*O*-dimethoxytrityl-4'-*O*-triisopropylsilyloxymethyl- $\beta$ -*L*-ribofuranosyl-cytosine-3'-[(2-cyanoethyl)-(*N,N*-diisopropyl)]-phosphoramidite (**13**). DMT-protected nucleoside **10** (287

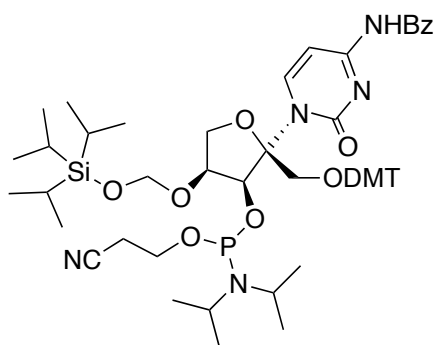

mg, 0.34 mmol) was dried by co-evaporation with toluene (3 x 10 mL) and dissolved in anhydrous CH<sub>2</sub>Cl<sub>2</sub> (2.5 mL) followed by the addition of (iPr)<sub>2</sub>EtN (231.5  $\mu$ L, 4 eq.). 2-cyanoethyl-*N,N*-diisopropyl chlorophosphoramidite **5** (152.2  $\mu$ L, 2.0 eq.) was added to the stirred solution and irradiated in a microwave reactor at 65 °C for 1 h. Saturated aqueous NaHCO<sub>3</sub> (3 mL) solution was added to quench the reaction at room temperature. The mixture was partitioned between CH<sub>2</sub>Cl<sub>2</sub> (50 mL) and saturated aqueous NaHCO<sub>3</sub> (30 mL).

Then, the aqueous layer was extracted with CH<sub>2</sub>Cl<sub>2</sub> (3 x 50 mL). The combined organic extract was washed with brine (20 mL), dried over anhydrous MgSO<sub>4</sub>, filtered and concentrated *in vacuo*. The crude product was purified by silica gel flash chromatography (hexanes/EtOAc 2:1 (2% Et<sub>3</sub>N)  $\rightarrow$  hexanes/EtOAc 3:2 (2% Et<sub>3</sub>N)) to yield compound **13** as white foam (261 mg, 74% yield, 2:1 diastereomers). Data for **13**: R<sub>f</sub>: 0.53 (AcOEt:hexanes, 1:1 containing 2%Et<sub>3</sub>N); <sup>1</sup>H NMR (600 MHz, CDCl<sub>3</sub>,  $\delta$  (ppm)): 1.01–1.15 (m, 33H, Si(CHCH<sub>3</sub>)<sub>3</sub>, Si(CHCH<sub>3</sub>)<sub>3</sub> and N(CHCH<sub>3</sub>)<sub>2</sub>), 2.28 (2t, *J* = 7.4 Hz, 0.3H, OCH<sub>2</sub>CH<sub>2</sub>CN), 2.52–2.60 (m, 0.7H, OCH<sub>2</sub>CH<sub>2</sub>CN), 3.38–3.51 (m, 2H, N(CHCH<sub>3</sub>)<sub>2</sub>), 3.59–4.25 (m, 13H, H-1', H-1'', 2 OCH<sub>3</sub>, H-4', H-5', H-5'' and OCH<sub>2</sub>CH<sub>2</sub>CN), 4.80–4.85 (m, 1H, OCH<sub>2</sub>O), 4.96–5.00 (m, 1H, OCH<sub>2</sub>O), 5.22–5.33 (m, 1H, H-3'), 6.76–6.84 (m, 4H, arom.), 7.16–7.32 (m, 12H, arom., H-5), 7.52–7.66 (m, 4H, arom., H-6), 7.94 (bs, NH); <sup>13</sup>C NMR (150 MHz, CDCl<sub>3</sub>): 12.2–12.3 (Si(CHCH<sub>3</sub>)<sub>3</sub>), 18.2 (Si(CHCH<sub>3</sub>)<sub>3</sub>), 19.9–20.4 (OCH<sub>2</sub>CH<sub>2</sub>CN), 24.6–25.1 (NCH(CH<sub>3</sub>)<sub>2</sub>), 43.6–43.9 (NCH(CH<sub>3</sub>)<sub>2</sub>), 55.5, 55.6 (OCH<sub>3</sub>), 59.1–59.5 (OCH<sub>2</sub>CH<sub>2</sub>CN), 63.54 (C-1'), 70.5, 70.7 (C-5'), 74.4–74.8 (C-3'/C-4'), 86.3 (quaternary C-DMTr), 89.9 (OCH<sub>2</sub>O), 101.3 (C-2'), 113.4 113.3, 113.3, 113.4, 118.1, 118.3, 127.1, 128.1, 128.5, 129.5, 130.3, 130.4, 133.6, 136.3, 145.1, 145.2, 155.0, 158.7, 162.6, 163.4 (arom. C, C-4, C-5, CO); <sup>31</sup>P NMR (243 MHz, CDCl<sub>3</sub>  $\delta$  (ppm)): 153.1, 153.3; HRMS (ESI-TOF high-acc) calcd for C<sub>56</sub>H<sub>74</sub>N<sub>5</sub>O<sub>10</sub>PSi (M+H)<sup>+</sup>: 1036.5015, found: 1036.4998. Calcd for (M+MeOH+H)<sup>+</sup>: 1068.5283, found 1068.5267. Additional peaks: (M+H<sub>2</sub>O+H, 100%)<sup>+</sup>: 1054.5126/1054.5106, (M+Et<sub>3</sub>NH)<sup>+</sup>: 1137.6225/1137.6202. The peak at 967 is attributed to (M–N(CHCH<sub>3</sub>)<sub>2</sub>+MeOH)<sup>+</sup>.

18\_1\_4\_5/1

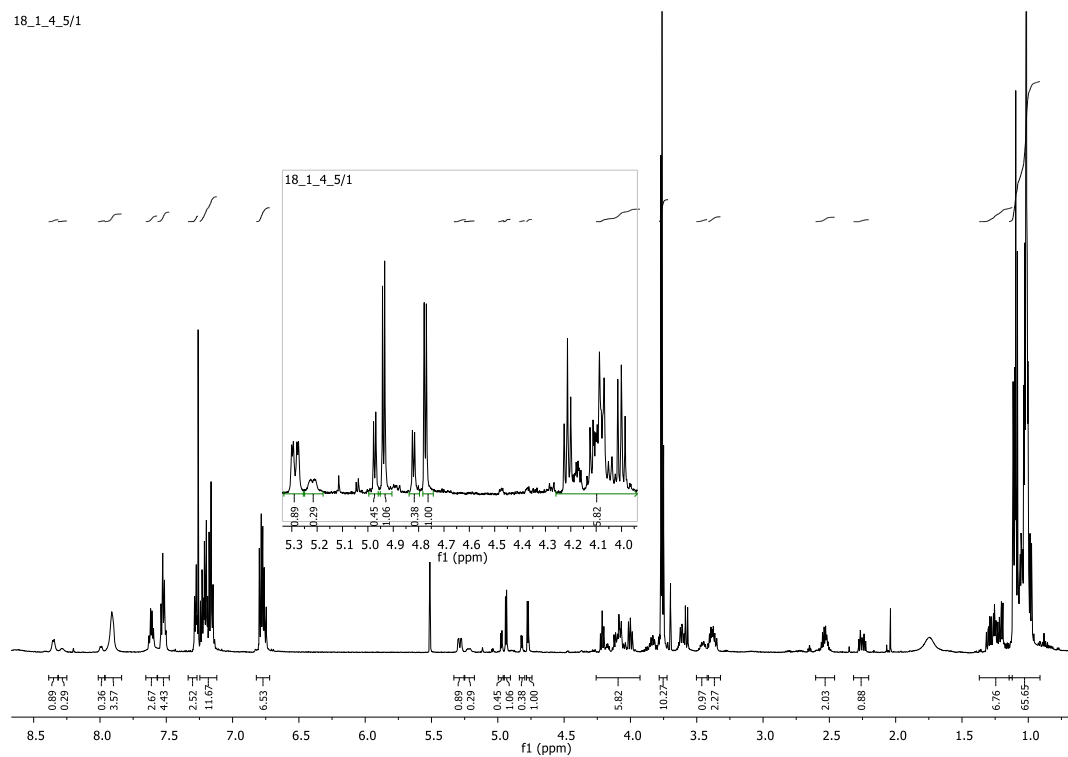

Figure S11.  $^1\text{H}$  NMR of **13** in  $\text{CDCl}_3$

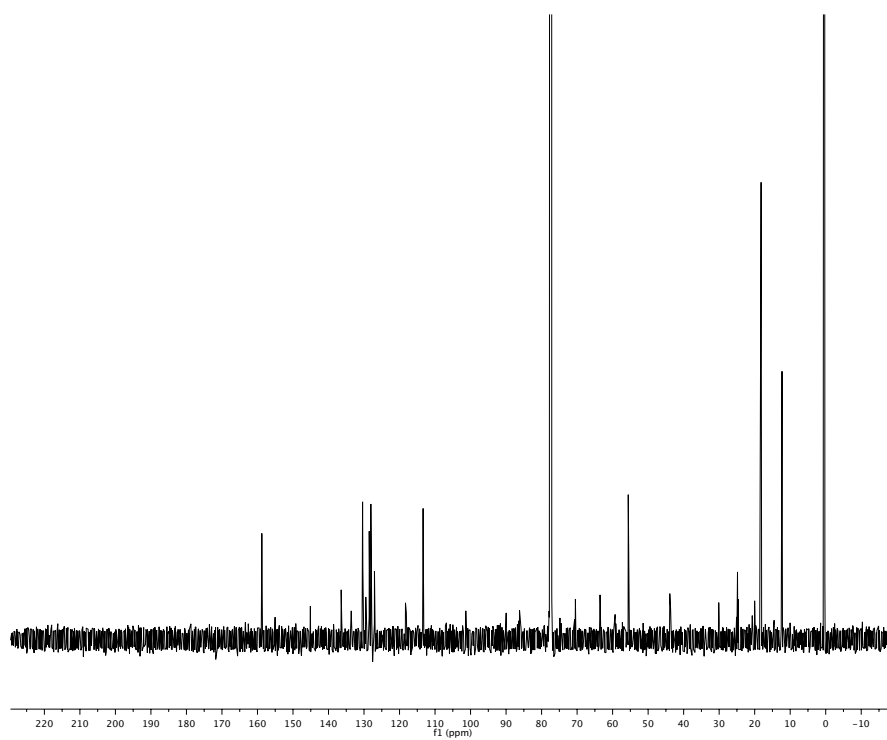

Figure S12.  $^{13}\text{C}$  NMR of **13** in  $\text{CDCl}_3$

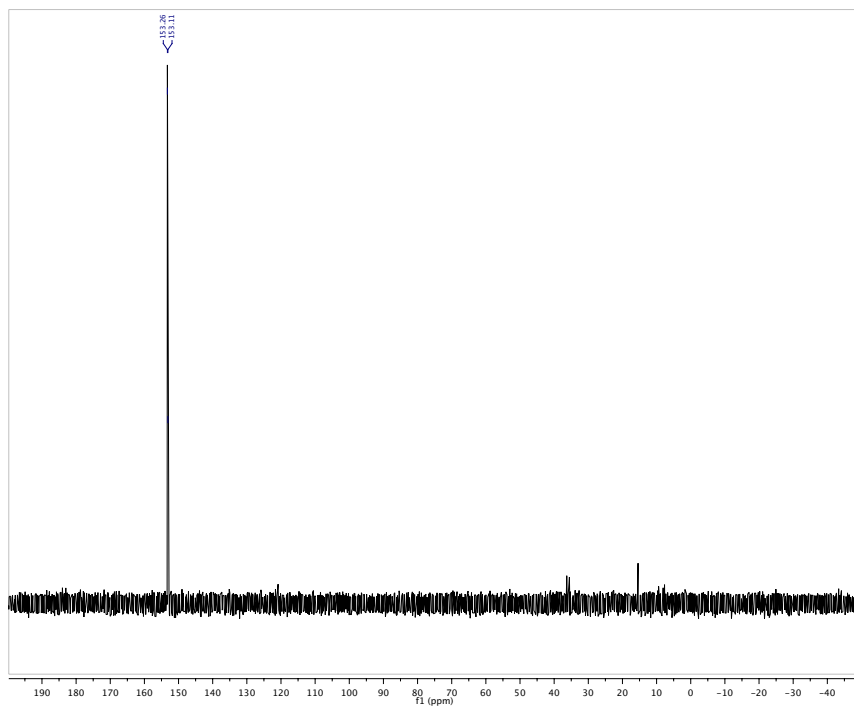

Figure S13.  $^{31}\text{P}$  NMR of **13** in  $\text{CDCl}_3$

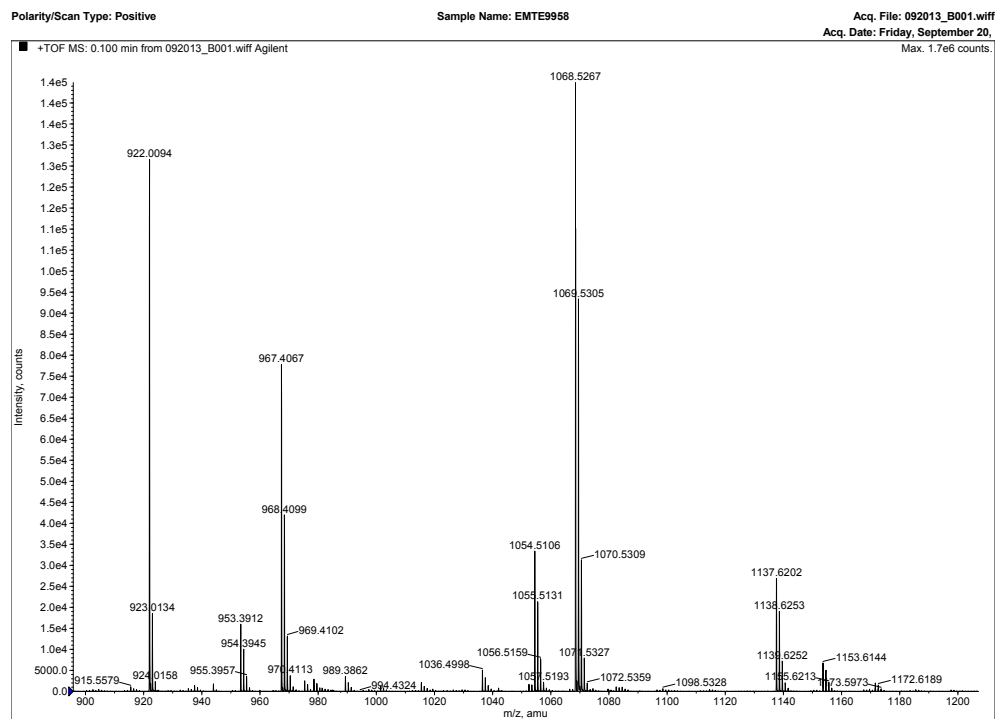

Figure S14. HRMS (ESI-TOF high-accu) of phosphoramidite **13**

*N*2-acetyl-1'-*O*-dimethoxytrityl-4'-*O*-triisopropylsilyloxymethyl- $\beta$ -*L*-ribofuranosyl-guanine-3'-[(2-cyanoethyl)-(*N,N*-diisopropyl)]-phosphoramidite (**14**). DMT-protected nucleoside **11** (50

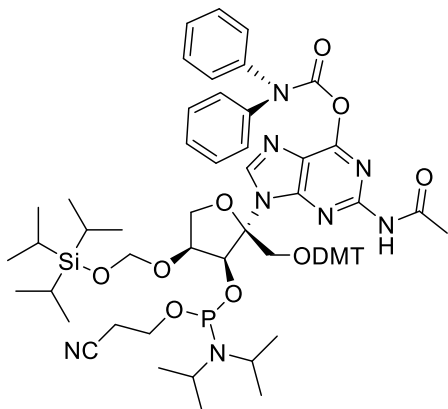

mg, 49.5  $\mu$ mol) was dried by co-evaporation with toluene (3 x 10 mL) and dissolved in anhydrous  $\text{CH}_2\text{Cl}_2$  (500  $\mu$ L) followed by the addition of (*i*Pr) $_2$ EtN (34.5  $\mu$ L, 198.2  $\mu$ mol). To this solution was added 2-cyanoethyl-*N,N*-diisopropyl chlorophosphoramidite **5** (22.1  $\mu$ L, 99.1  $\mu$ mol), followed by a catalytic amount of dimethylaminopyridine (DMAP) (3 mg, 24.8  $\mu$ mol), and this solution was irradiated in a microwave reactor at 65  $^\circ\text{C}$  for 1 h. After cooling the reaction on ice, it was quenched with saturated aqueous  $\text{NaHCO}_3$  (1 mL). This mixture was partitioned between  $\text{CH}_2\text{Cl}_2$  (10 mL) and

saturated aqueous  $\text{NaHCO}_3$  (5 mL). Then, the aqueous layer was back-extracted with  $\text{CH}_2\text{Cl}_2$  (2 x 5 mL). The combined organic extracts were then washed with brine (5 mL), dried over anhydrous  $\text{Na}_2\text{SO}_4$ , and concentrated *in vacuo*. The crude product was purified by silica gel flash chromatography using a gradient of 3:7  $\rightarrow$  6:4 EtOAc/hex containing 2%  $\text{Et}_3\text{N}$  to yield compound **14** as a white foam (30 mg, 50% yield) and a mixture of diastereomers. Data for **14**:  $R_f$ : 0.64 (EtOAc:hexanes, 5:5 containing 2% $\text{Et}_3\text{N}$ );  $^1\text{H}$  NMR (600 MHz,  $\text{CDCl}_3$ ,  $\delta$  (ppm)): 0.92–1.04 (*m*, 23H), 1.08–1.15 (*m*, 10H), 2.29 (*t*,  $J = 6.3$  Hz, 1H), 2.40, 2.48 (2*s*, 3H), 2.55 (*t*,  $J = 6.3$  Hz, 1H), 3.16–3.56 (*m*, 4H), 3.64 (*d*,  $J = 10.5$  Hz, 0.5H, H-1'), 3.69–3.71 (4*s*, 6H, 2 x OMe (DMT)), 3.74 (*d*,  $J = 10.5$  Hz, 0.5H, H-1'), 3.77–3.88 (*m*, 1H), 3.93, 4.06 (2*d*,  $J = 10.5$  Hz, 1H, H-1''), 4.09–4.24 (*m*, 2H), 4.40–4.44 (*m*, 1H), 4.74, 4.77, 4.91, 4.96 (4*d*,  $J = 5.0$  Hz, 1.5H,  $\text{SiOCH}_2\text{O}$ ), 5.26, 5.54 (2*dd*,  $J = 11.0, 3.9$  Hz, 0.5H,  $\text{SiOCH}_2\text{O}$ ), 6.59–6.69 (*m*, 4H), 7.00–7.17 (*m*, 8H), 7.20–7.25 (*m*, 4H), 7.34 (*t*,  $J = 7.7$  Hz, 4H), 7.44 (*bs*, 4H), 8.20, 8.23 (2*s*, 1H, H-8), 8.28 (*bs*, 1H, N2-NH);  $^{13}\text{C}$  NMR (150 MHz,  $\text{CDCl}_3$ ,  $\delta$  (ppm)): 12.0, 12.0, 17.9, 17.9, 17.9, 20.1, 20.1, 20.4, 20.4, 20.5, 24.5, 24.5, 24.6, 24.7, 29.2, 29.8, 31.7, 34.8, 43.3, 43.4, 43.5, 43.5, 55.2, 55.3, 55.3, 58.4, 58.6, 62.7, 63.4, 64.2, 71.1, 71.3, 75.4, 75.5, 75.7, 75.9, 86.2, 86.2, 89.8, 89.9, 98.3, 98.3, 98.5, 98.5, 113.0, 113.0, 113.1, 117.6, 117.7, 121.9, 122.0, 126.7, 126.8, 127.8, 127.9, 128.0, 129.3, 129.7, 129.9, 130.1, 134.7, 135.1, 135.6, 135.7, 142.0, 143.7, 144.4, 150.4, 150.5, 151.3, 151.5, 153.1, 153.4, 155.8, 155.9, 158.4, 158.5, 158.5, 158.5;  $^{31}\text{P}$  NMR (243 MHz,  $\text{CDCl}_3$ ,  $\delta$  (ppm)): 150.83, 151.23; HRMS (ESI-TOF high-acc) calcd for  $\text{C}_{65}\text{H}_{81}\text{N}_8\text{O}_{11}\text{PSi}$ : calcd 1209.5604  $[\text{M}+\text{H}]^+$ ; found 1209.5602  $[\text{M}+\text{H}]^+$ ; peak at 1310.6808 corresponds to  $[\text{M}+\text{Et}_3\text{N}^+\text{H}]^+$ .

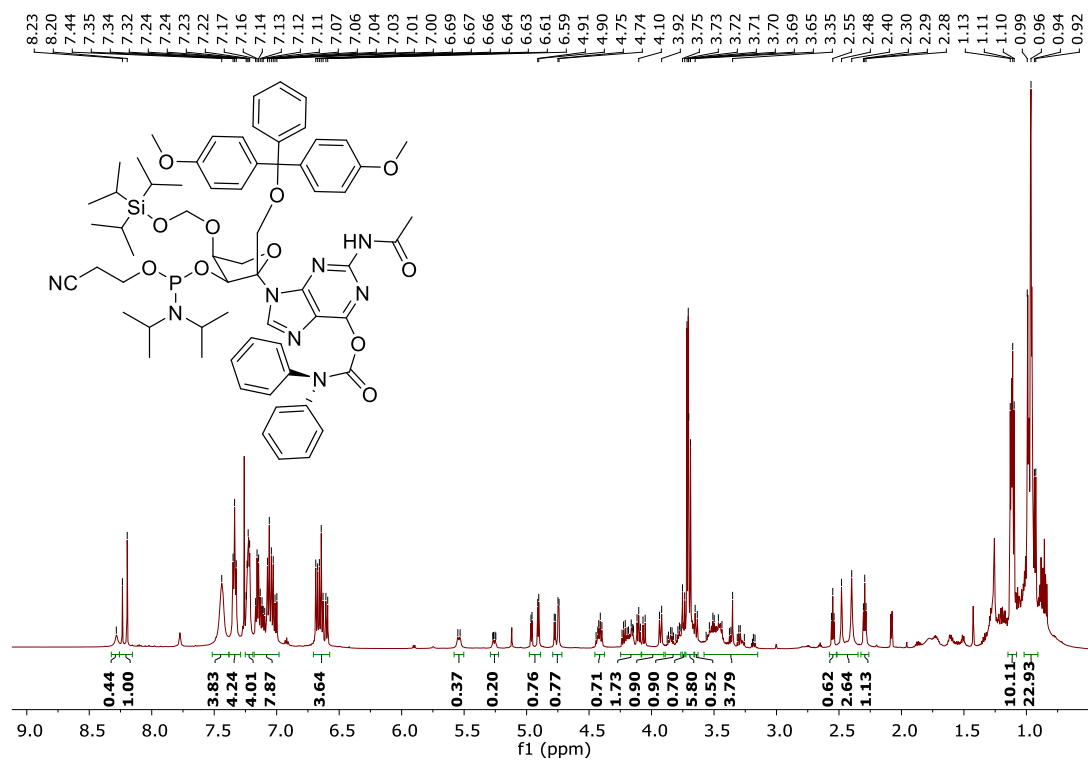

Figure S15.  $^1\text{H}$ NMR of phosphoramidite **14** in  $\text{CDCl}_3$

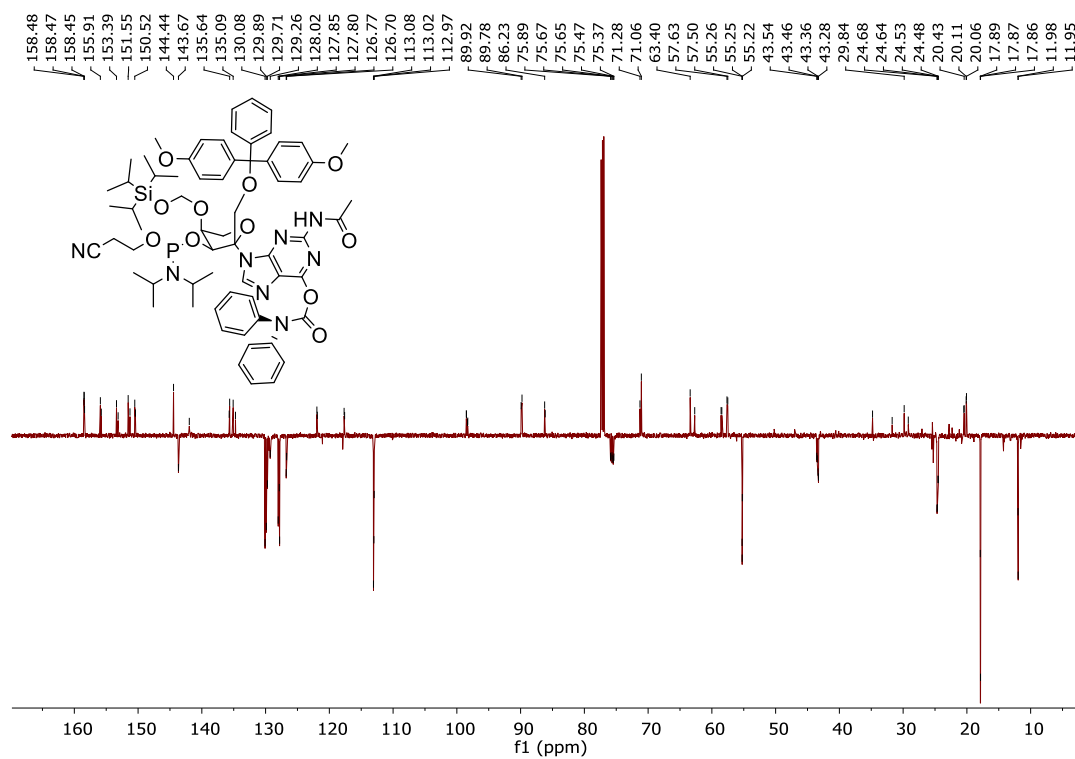

Figure S16.  $^{13}\text{C}$ NMR of phosphoramidite **14** in  $\text{CDCl}_3$

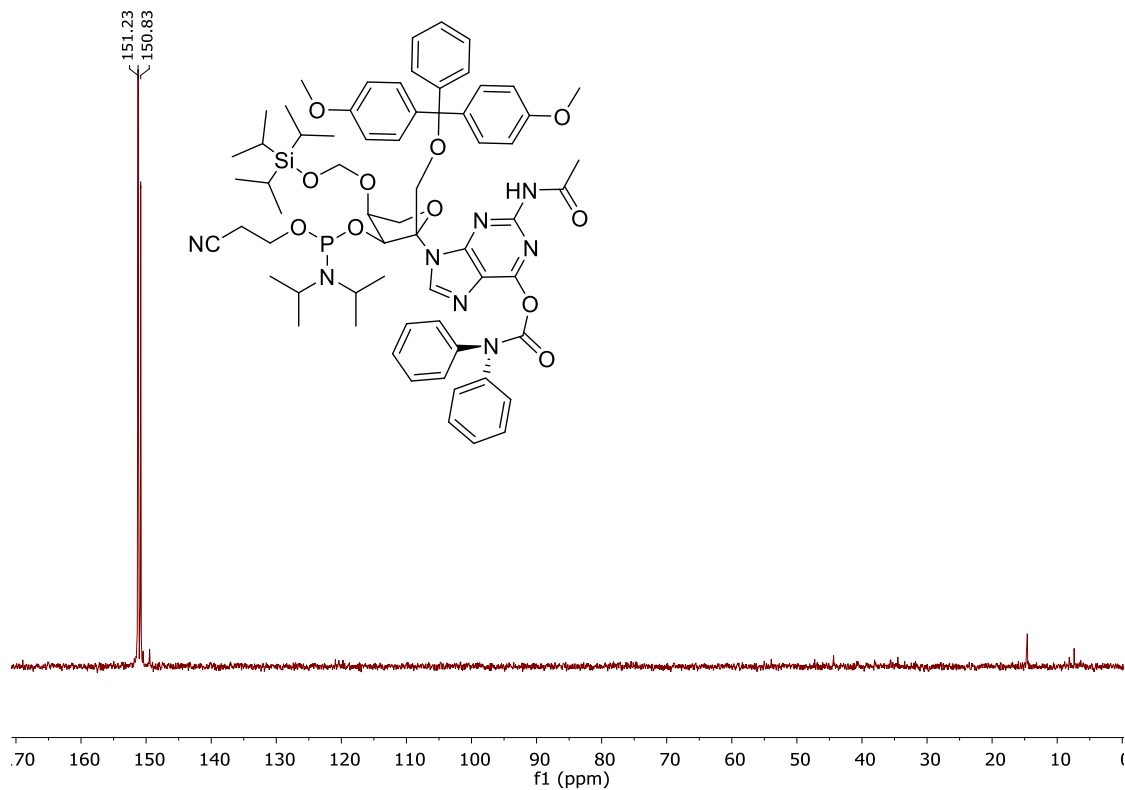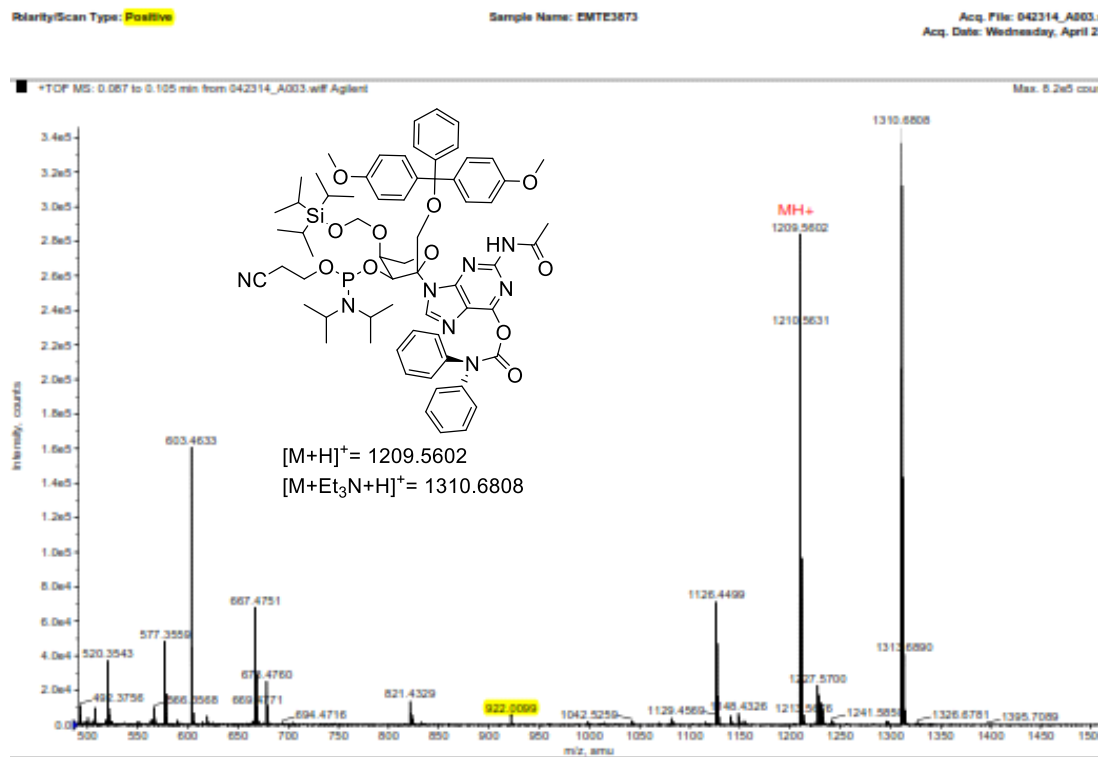



1'-O-(4,4'-dimethoxytrityl)-3'-O-tri-isopropylsilyloxymethyl-L-ribulofuranosylthymine-4'-O-[O-(2-cyanoethyl)-(N,N-diisopropyl)]-phosphoramidite (**16**): Ribulofuranosylthymine **15** (0.070 g,

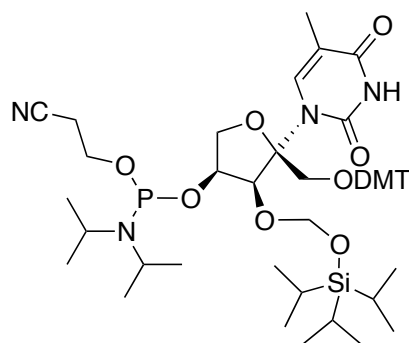

0.094 mmol) was azeotroped with anhydrous toluene (3 x 5 mL), dried under high vacuum overnight, and further taken up in of anhydrous CH<sub>2</sub>Cl<sub>2</sub> (1 mL), followed by the addition of (iPr)<sub>2</sub>EtN (0.08 mL, 0.47 mmol) under argon atmosphere. This solution was transferred to a microwave tube (2–5 mL) containing

2-cyanoethyl-*N,N*-diisopropyl chlorophosphoramidite **5** (0.04 mL, 0.19 mmol). The microwave tube was sealed and irradiated at 65 °C for 15 min.

The reaction mixture was quenched by the addition of saturated NaHCO<sub>3</sub> (5 mL) solution, extracted with CH<sub>2</sub>Cl<sub>2</sub> (3 x 50 mL), washed with water (20 mL) followed by brine (50 mL) and dried over anhydrous MgSO<sub>4</sub>. The resulting solution was filtered and concentrated *in vacuo*. The crude product was purified by silica gel column chromatography (30% EtOAc/hexanes containing 2% Et<sub>3</sub>N) to afford 0.069 g (78%) of pure phosphoramidite **16** as a white amorphous solid (mixture of diastereomers in ratio of 2:1). Data for **16**: R<sub>f</sub>: 0.62 and 0.55 (50% EtOAc/hexanes); <sup>1</sup>H NMR (600 MHz, CDCl<sub>3</sub>, δ (ppm)): 0.91–1.21 (m, 33H, Si(CH<sub>2</sub>CH<sub>3</sub>)<sub>3</sub>, Si(CH<sub>2</sub>CH<sub>3</sub>)<sub>3</sub> and N(CH<sub>2</sub>CH<sub>3</sub>)<sub>2</sub>), 1.98 and 1.99 (2s, 3H, CH<sub>3</sub>(C-5)), 2.49 (t, *J* = 6.6 Hz, 1H, OCH<sub>2</sub>CH<sub>2</sub>CN), 2.60 (t, *J* = 6.0 Hz, 1H, OCH<sub>2</sub>CH<sub>2</sub>CN), 3.34–3.49 (m, 2H, N(CH<sub>2</sub>CH<sub>3</sub>)<sub>2</sub>), 3.63–4.15 (m, 12H, H-1', H-1'', 2 OCH<sub>3</sub>, H-5', H-5'' and OCH<sub>2</sub>CH<sub>2</sub>CN), 4.35–4.45 (m, H-4'); 4.88–4.93 (m, 1H, OCH<sub>2</sub>O), 4.94–4.99 (m, 1H, OCH<sub>2</sub>O), 4.99–5.04 (m, H-3'), 6.68–6.89 (m, 4H, arom.), 7.11–7.37 (m, 9H, arom.), 7.62–7.72 (m, 1H, H-6); <sup>13</sup>C NMR (150 MHz, CDCl<sub>3</sub> δ (ppm)): 12.0, 12.0, 12.1, 12.7 (Si(CH<sub>2</sub>CH<sub>3</sub>)<sub>3</sub>, CH<sub>3</sub>(C-5)), 18.0, 18.0, 18.0, 18.0 (Si(CH<sub>2</sub>CH<sub>3</sub>)<sub>3</sub>), 20.4, 20.5, 20.6, 20.7 (OCH<sub>2</sub>CH<sub>2</sub>CN), 24.6, 24.7, 24.7, 24.8, 24.8 (NCH(CH<sub>3</sub>)<sub>2</sub>), 43.4, 43.4, 43.4, 43.5 (NCH(CH<sub>3</sub>)<sub>2</sub>), 55.3, 55.4 (OCH<sub>3</sub>), 57.7, 57.8, 58.7, 58.8 (OCH<sub>2</sub>CH<sub>2</sub>CN), 62.9, 63.0 (C-1'), 70.8, 70.8 (C-5'), 71.3, 71.3, 72.5, 72.6, 73.0, 73.1, 79.0, 79.1, 80.5, 80.5 (C-3'/C-4'), 86.1, 86.2 (quaternary C-DMTr), 90.1, 90.6 (OCH<sub>2</sub>O), 99.1, 99.4 (C-2'), 108.7, 108.8 (C-5), 113.2, 113.2, 113.2, (arom. C), 117.8, 117.8 (CN), 126.9, 126.9, 127.0, 127.9, 127.9, 128.2, 128.2, 128.3, 130.1, 130.1, 130.2, 135.7, 135.8, 135.9, 136.0 (arom. C), 138.0, 138.3 (C-6), 144.8, 144.9, 149.7, 149.8 (C-2), 158.5, 158.6 (arom. C), 164.3, 164.4 (C-4); <sup>31</sup>P NMR (243 MHz, CDCl<sub>3</sub>): δ 150.4, 150.7; HRMS (ESI-TOF high-acc) calcd for C<sub>50</sub>H<sub>71</sub>N<sub>4</sub>O<sub>10</sub>PSi (M+H)<sup>+</sup>: 947.4750, found: 947.4732.

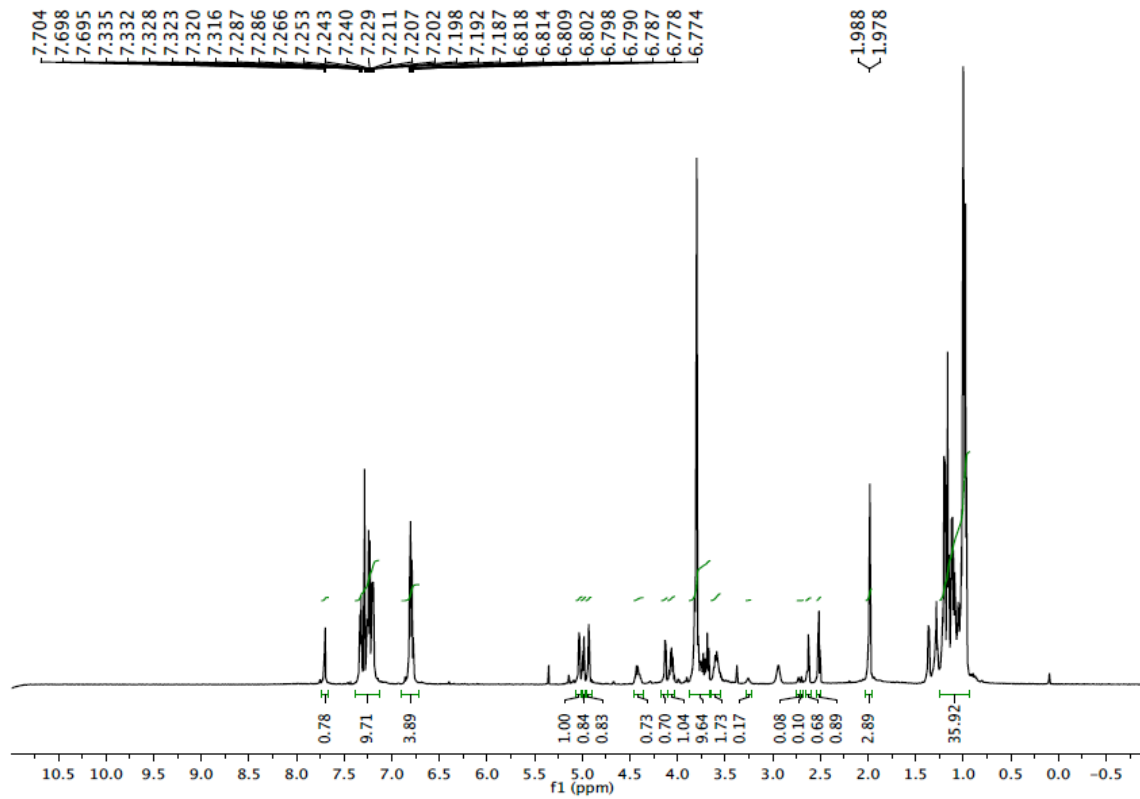

Figure S19.  $^1\text{H}$  NMR of protected L-ribuloT-phosphoramidite **16** in  $\text{CDCl}_3$

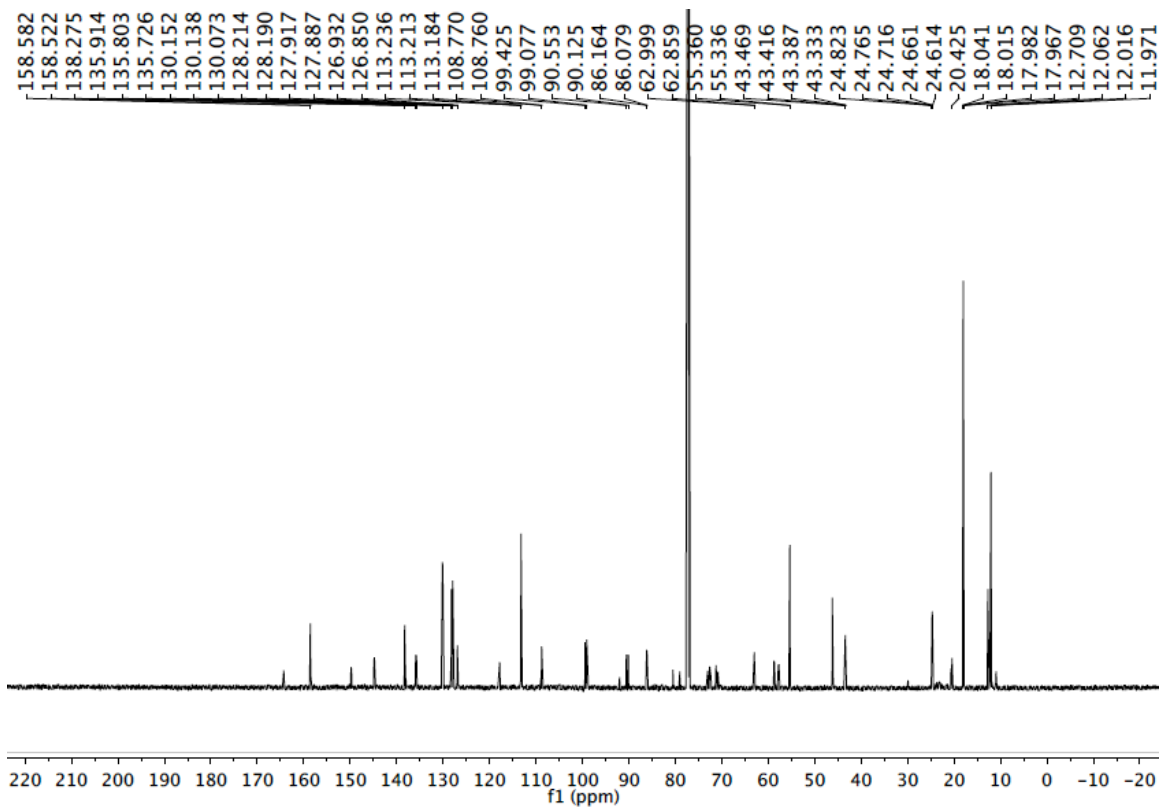

Figure S20.  $^{13}\text{C}$  NMR of protected L-ribuloT-phosphoramidite **16** in  $\text{CDCl}_3$

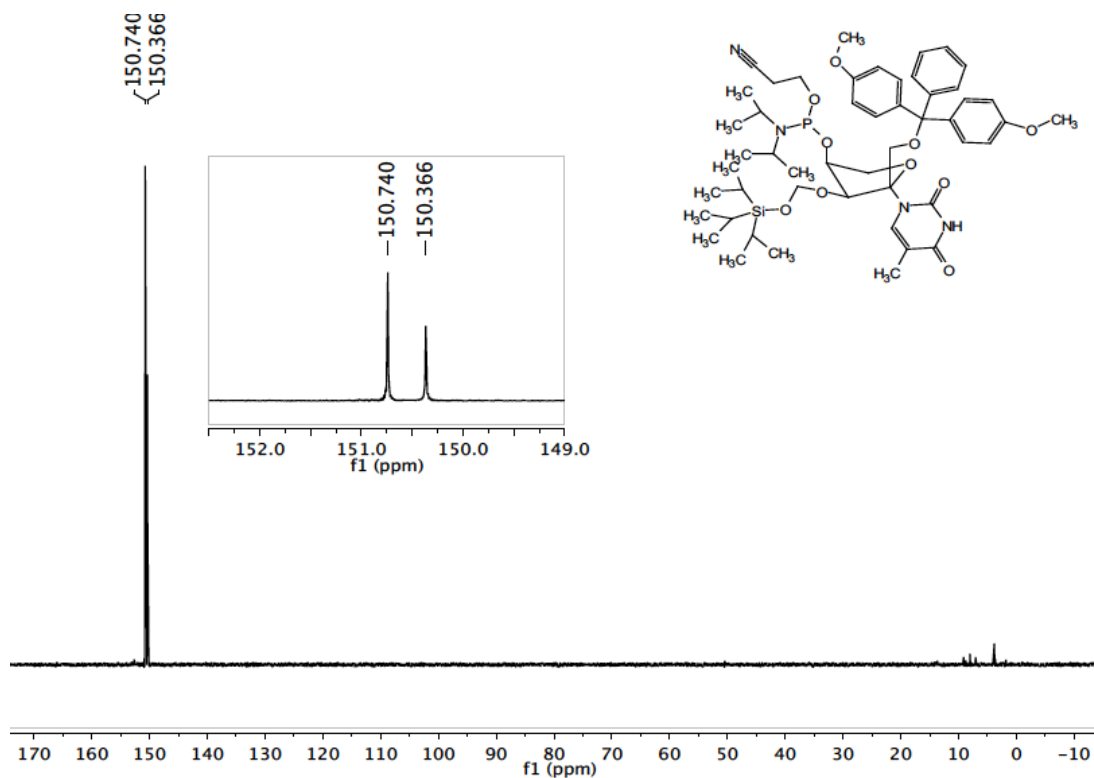

Figure S21.  $^{31}\text{P}$  NMR of protected L-ribulo-T-phosphoramidite **14** in  $\text{CDCl}_3$

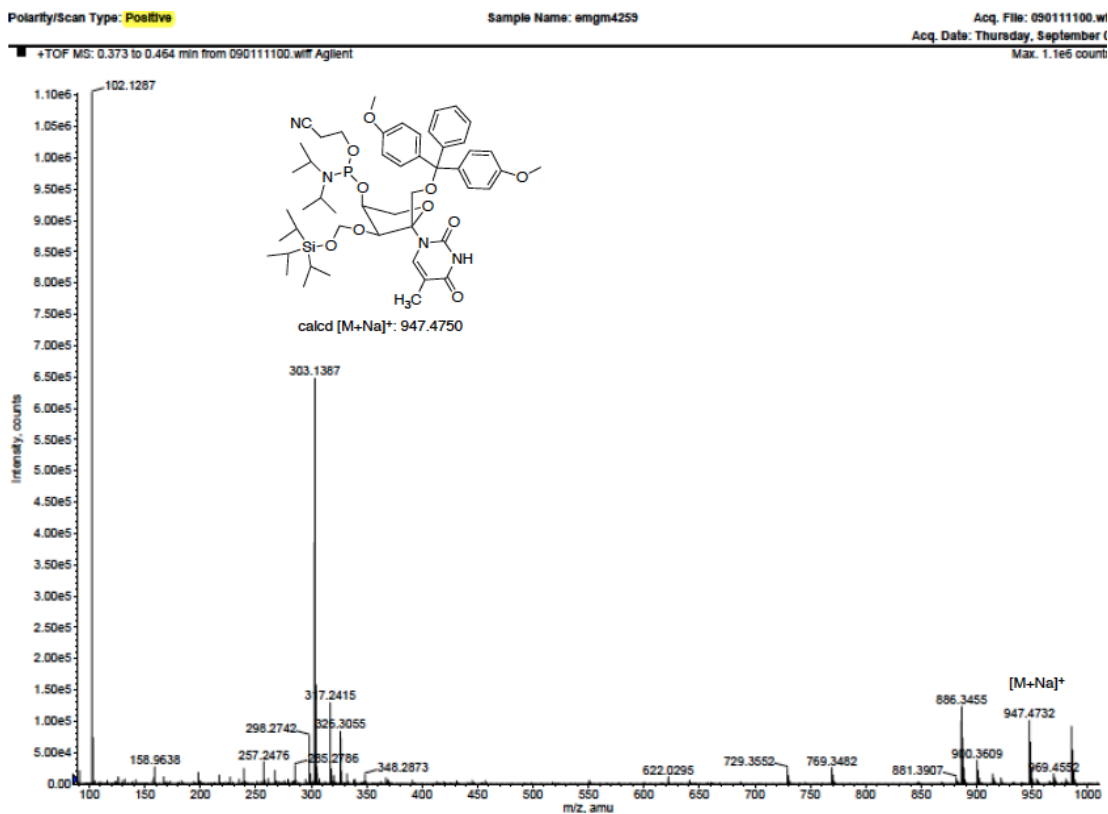

Figure S22. HRMS (ESI-TOF high-accu) of protected L-ribulo-T-phosphoramidite **16**

**DNA and RNA phosphoramidites:** The optimized procedures developed for the ribulose nucleoside series (see above) was used for the synthesis of the DNA and RNA phosphoramidites. Since the reaction temperature, reaction time and solvent was optimized with the ribulose nucleosides, and worked well in the DNA/RNA series, we did not have the need to optimize these parameters further, except with respect to the different activators as noted in Table S2. Only in the case of guanosine **24** (RNA) 10 min at 60 °C was explored.

**General procedure for synthesizing both DNA and RNA phosphoramidites via microwave using reagents 5 or 6:** DNA and RNA monomers **17-20** and **21-24** (0.5 mmol) were dissolved in anhydrous CH<sub>2</sub>Cl<sub>2</sub> (3 mL), followed by the addition of 2-cyanoethyl-*N,N*-diisopropyl chlorophosphoramidite **5** (0.65 mmol) with diisopropylethylamine (1.30 mmol), or 2-cyanoethyl-*N,N,N',N'*-tetraisopropyl phosphorodiamidite **6** (0.65 mmol) with activators 5-ethylthiotetrazole (0.65 mmol), or pyridinium chloride (0.65 mmol) under argon atmosphere in a microwave tube. The tube was sealed and irradiated at 65 °C while stirring for 15 min. The reaction mixture was concentrated to dryness and directly loaded on silica gel for purification by column chromatography (elution with 30%–80% EtOAc/hexanes containing 2% Et<sub>3</sub>N) to afford the corresponding DNA and RNA phosphoramidites, **25–28** and **29-32** respectively.

**Table S2.** Microwave phosphitylation of protected ribose and deoxyribose nucleosides **23–30**

| Entry | Nucleoside | Reagent   | Phosphoramidites | Time   | Yield (%) |
|-------|------------|-----------|------------------|--------|-----------|
| 1.    | <b>18</b>  | <b>5</b>  | <b>26</b>        | 15 min | 75        |
| 2.    | <b>17</b>  | <b>6</b>  | <b>25</b>        | 15 min | 83        |
| 3.    | <b>18</b>  | <b>6</b>  | <b>26</b>        | 15 min | 89        |
| 4.    | <b>19</b>  | <b>6</b>  | <b>27</b>        | 15 min | 90        |
| 5.    | <b>20</b>  | <b>6</b>  | <b>28</b>        | 15 min | 47        |
| 6.    | <b>20</b>  | <b>5</b>  | <b>28</b>        | 15 min | 70        |
| 7.    | <b>21</b>  | <b>6</b>  | <b>29</b>        | 15 min | 62        |
| 8.    | <b>22</b>  | <b>6</b>  | <b>30</b>        | 15 min | 88        |
| 9.    | <b>23</b>  | <b>6</b>  | <b>31</b>        | 15 min | 50        |
| 10.   | <b>24</b>  | <b>5</b>  | <b>32</b>        | 15 min | 40        |
| 11.   | <b>24</b>  | <b>6</b>  | <b>32</b>        | 15 min | 40        |
| 12.   | <b>24</b>  | <b>6*</b> | <b>32</b>        | 15 min | 44        |

\*Pyridinium chloride activator used for phosphitylating nucleoside **24**. Phosphitylations were performed in triplicate with reagent **6**, and at least once with reagent **5**.

5'-O-(4,4'-dimethoxytrityl)-2'-deoxythymidine-3'-O-[O-(2-cyanoethyl)-N,N-diisopropylphosphoramidite (**25**): 83% yield;  $^{31}\text{P}$  NMR (243 MHz,  $\text{CDCl}_3$   $\delta$  (ppm)): 149.04, 149.47.

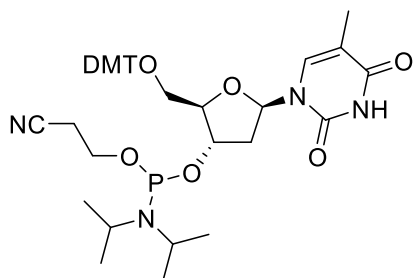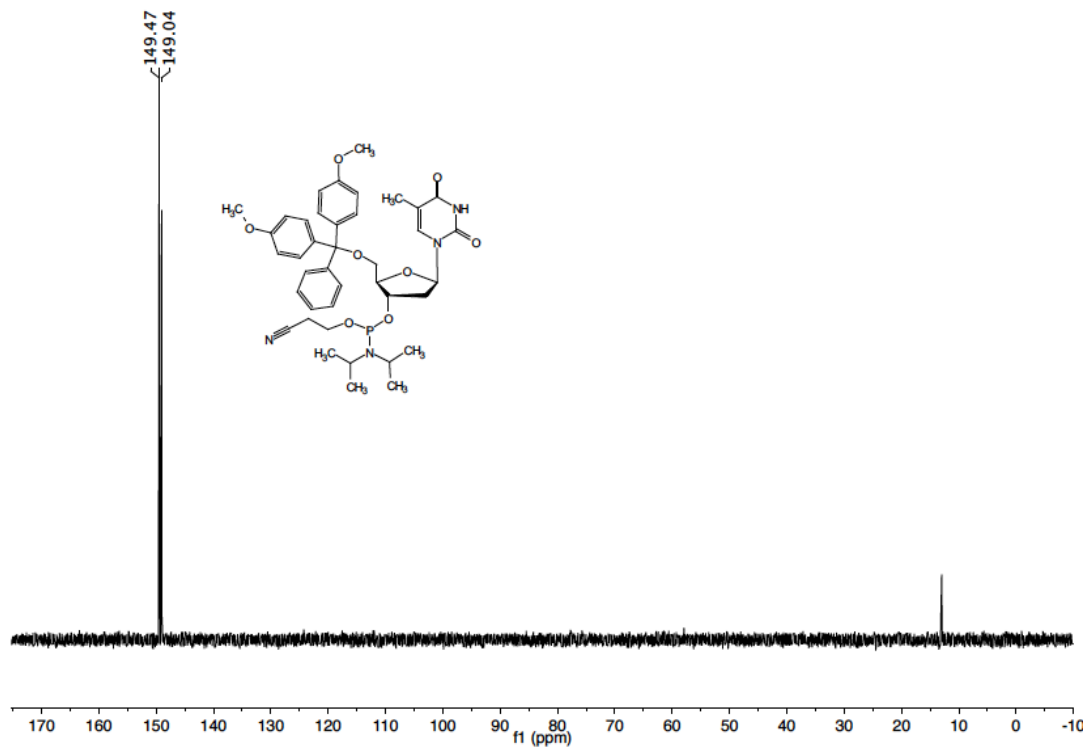

Figure S23.  $^{31}\text{P}$  NMR of DNA phosphoramidite dT **25** in  $\text{CDCl}_3$

*N*6-benzoyl-5'-*O*-(4,4'-dimethoxytrityl)-2'-deoxyadenosine-3'-*O*-[*O*-(2-cyanoethyl)-*N,N*-diisopropylphosphoramidite (**26**): 89% yield;  $^{31}\text{P}$  NMR (243 MHz,  $\text{CDCl}_3$   $\delta$  (ppm)): 149.31, 149.46.

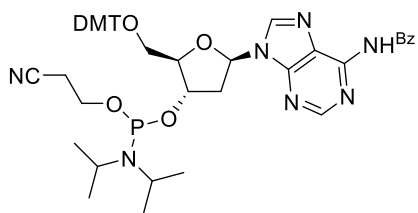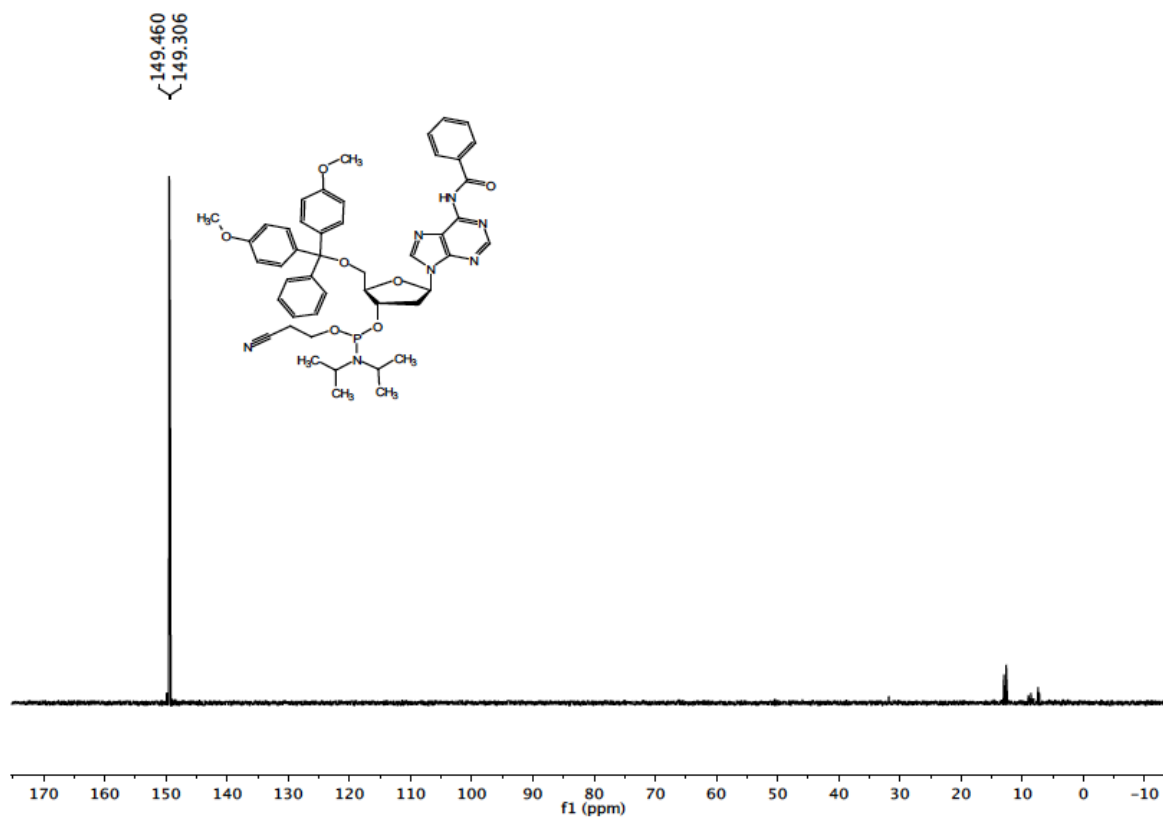

Figure S24.  $^{31}\text{P}$  NMR of DNA phosphoramidite  $\text{dA}^{\text{Bz}}$  **26** in  $\text{CDCl}_3$

*N*4-benzoyl-5'-*O*-(4,4'-dimethoxytrityl)-2'-deoxycytidine-3'-*O*-[*O*-(2-cyanoethyl)-*N,N*-diisopropylphosphoramidite (**27**): 90% yield;  $^{31}\text{P}$  NMR (243 MHz,  $\text{CDCl}_3$   $\delta$  (ppm)): 149.28, 149.86.

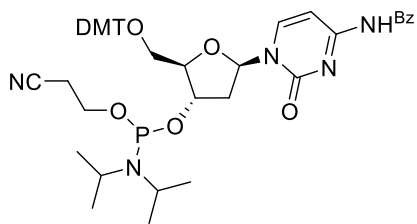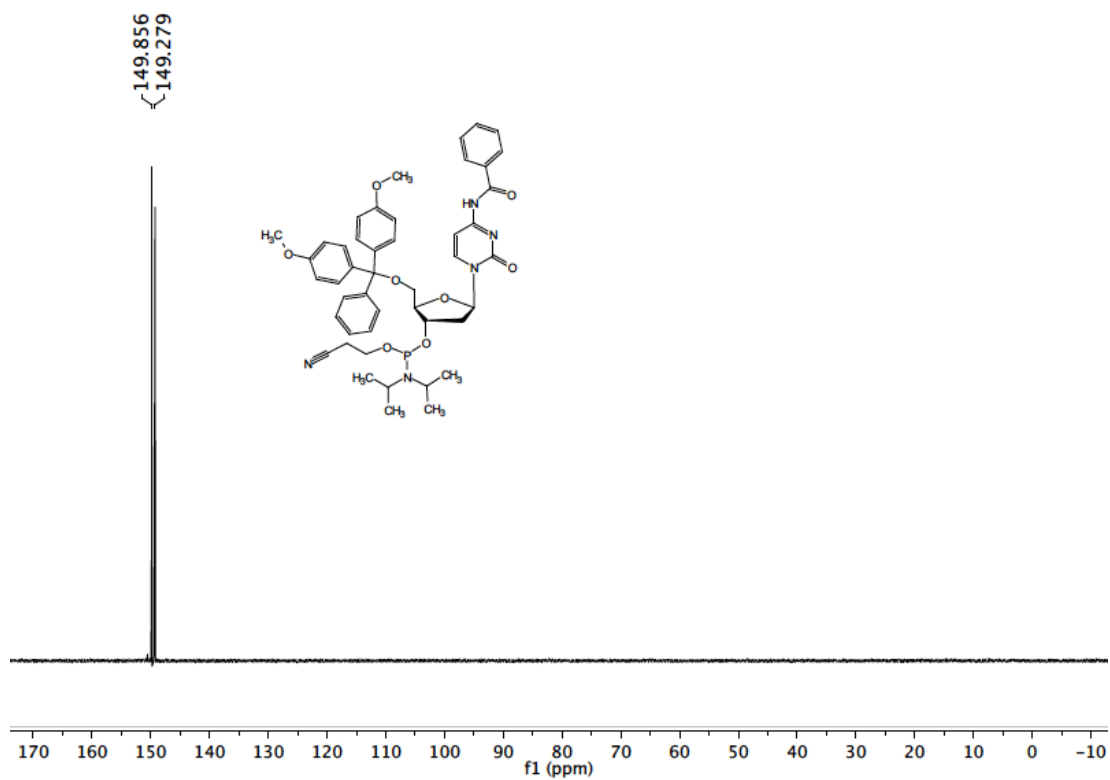

Figure S25.  $^{31}\text{P}$  NMR of DNA phosphoramidite  $\text{dC}^{\text{Bz}}$  **27** in  $\text{CDCl}_3$

*N*2-isobutyryl-5'-*O*-(4,4'-dimethoxytrityl)-2'-deoxyguanine-3'-*O*-[*O*-(2-cyanoethyl)-*N,N*-diisopropylphosphoramidite (**28**): 70% yield (with H-phosphonate impurity);  $^{31}\text{P}$  NMR (243 MHz,  $\text{CDCl}_3$   $\delta$  (ppm)): 148.28, 148.95.

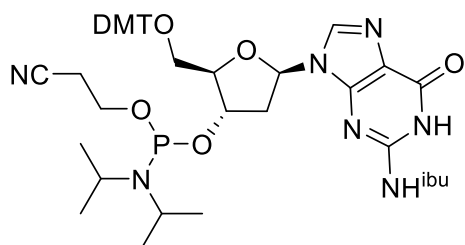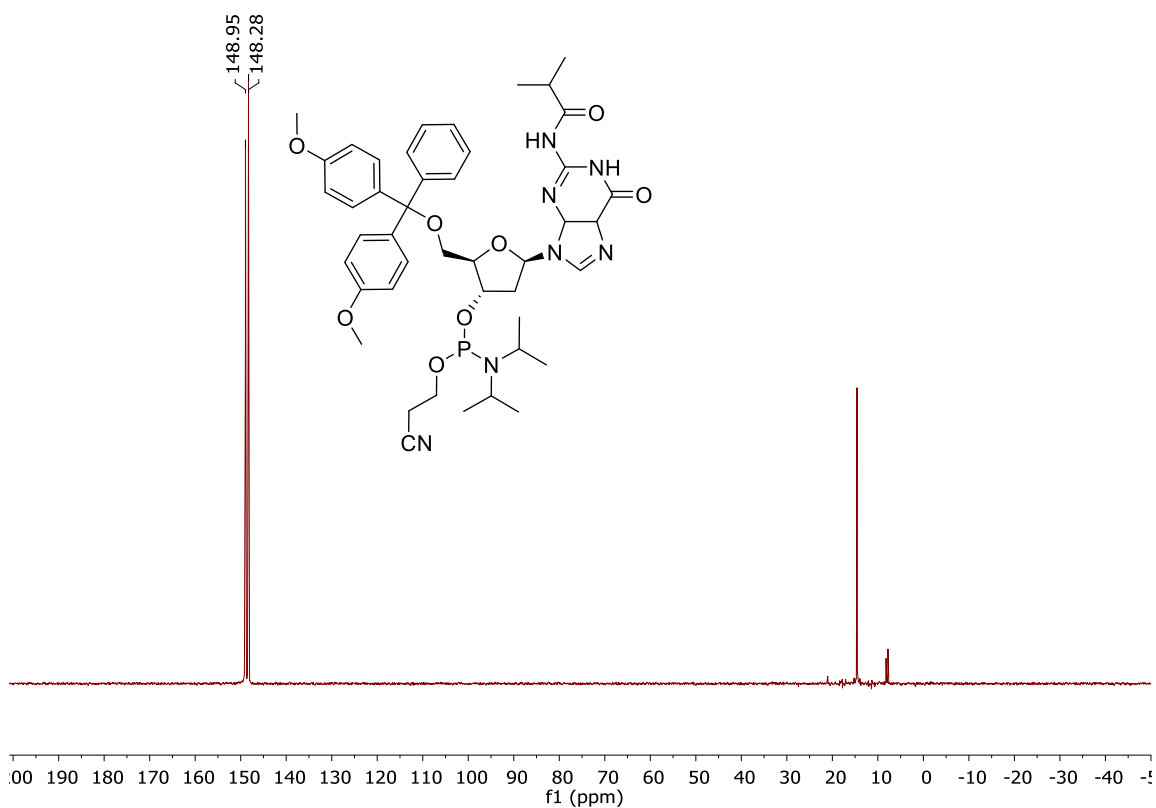

Figure S26.  $^{31}\text{P}$  NMR of DNA phosphoramidite  $\text{dG}^{\text{ibu}}$  **28** in  $\text{CDCl}_3$



5'-O-(4,4'-dimethoxytrityl)-2'-O-tertbutyl(dimethylsilyl)uracil-3'-O-[O-(2-cyanoethyl)-N,N-diisopropylphosphoramidite (**29**): 62% yield;  $^{31}\text{P}$  NMR (243 MHz,  $\text{CDCl}_3$   $\delta$  (ppm)): 149.95, 150.29.

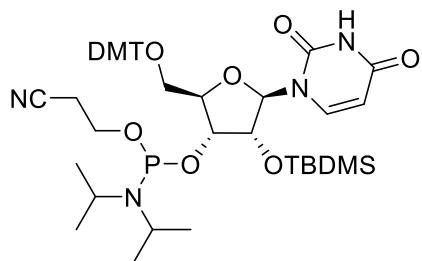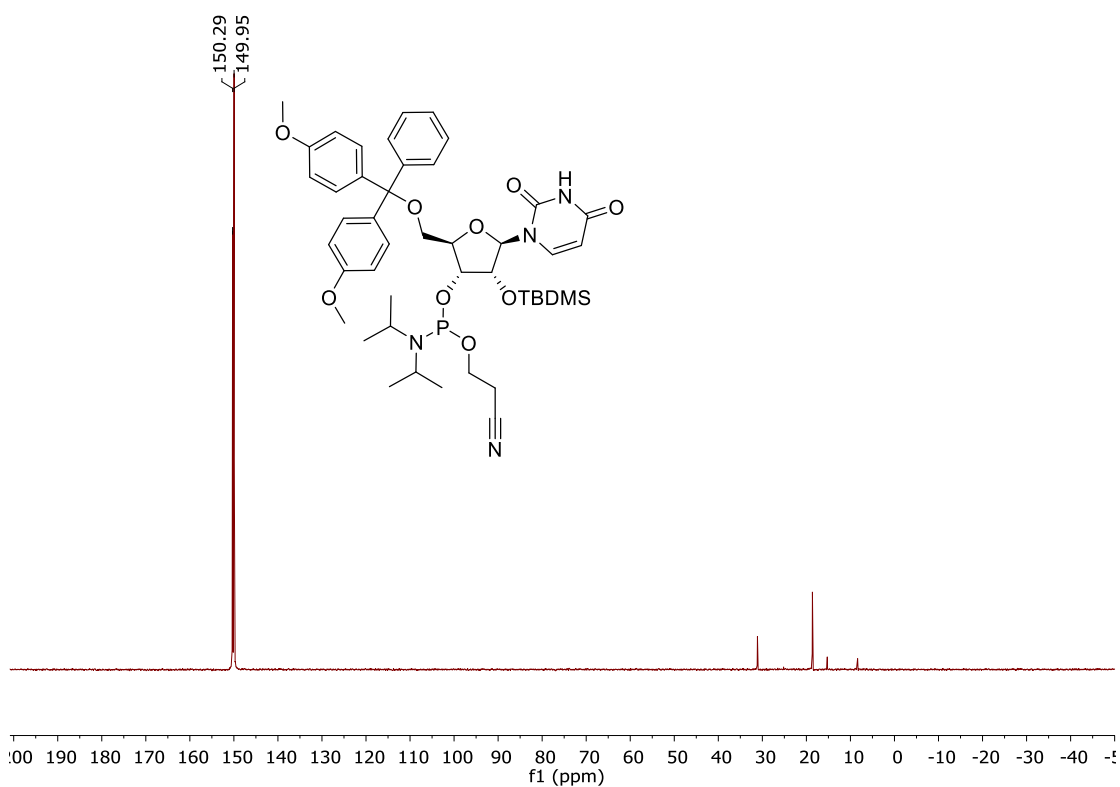

Figure S27.  $^{31}\text{P}$  NMR of DNA phosphoramidite U **29** in  $\text{CDCl}_3$

*N*6-benzoyl-5'-*O*-(4,4'-dimethoxytrityl)-2'-*O*-*tert*butyl(dimethylsilyl)adenine-3'-*O*-[*O*-(2-cyanoethyl)-*N,N*-diisopropylphosphoramidite (**30**): 50% yield;  $^{31}\text{P}$  NMR (243 MHz,  $\text{CDCl}_3$   $\delta$  (ppm)): 149.45, 151.45.

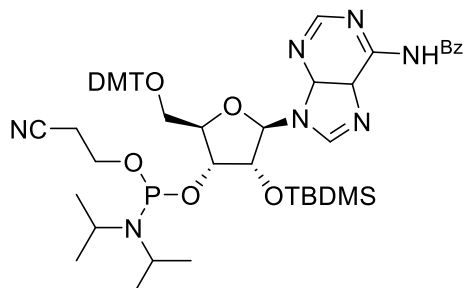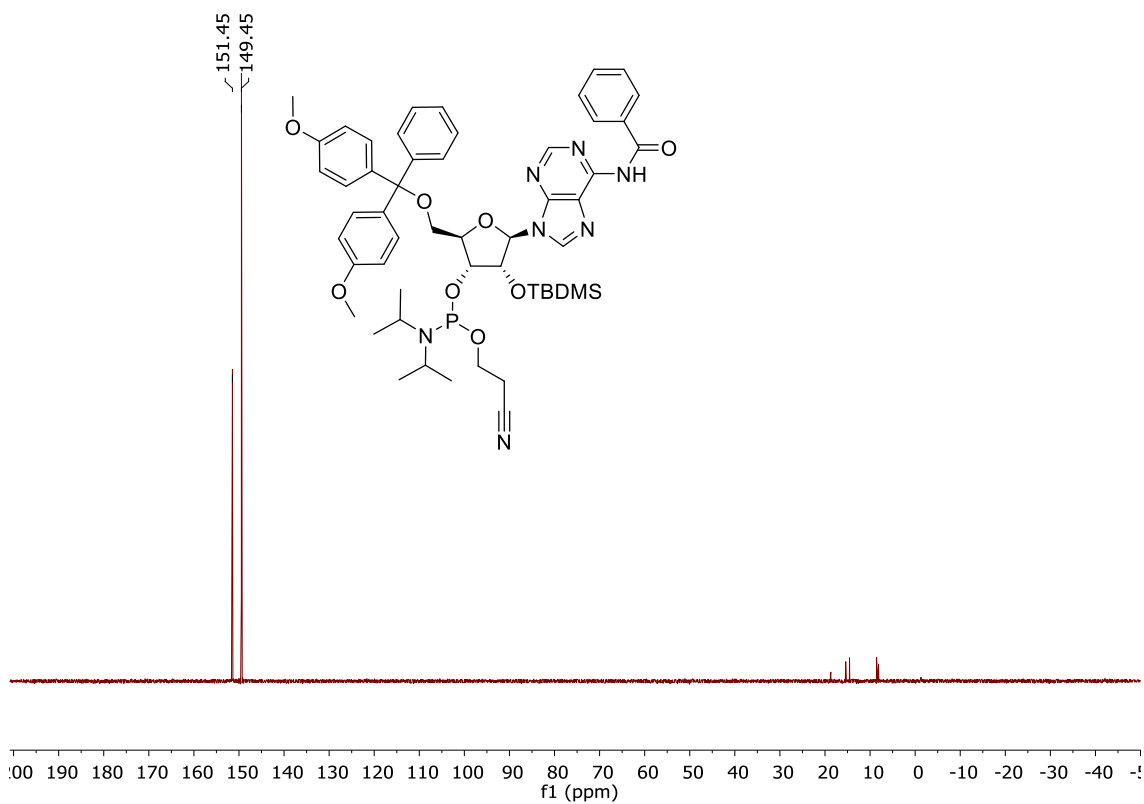

Figure S28.  $^{31}\text{P}$  NMR of RNA phosphoramidite A<sup>Bz</sup> **30** in  $\text{CDCl}_3$

*N*4-acetyl-5'-*O*-(4,4'-dimethoxytrityl)-2'-*O*-tertbutyl(dimethylsilyl)cytidine-3'-*O*-[*O*-(2-cyanoethyl)-*N,N*-diisopropylphosphoramidite (**31**): 88% yield (with slight H-phosphonate impurity);  $^{31}\text{P}$  NMR (243 MHz,  $\text{CDCl}_3$   $\delta$  (ppm)): 149.51, 150.51.

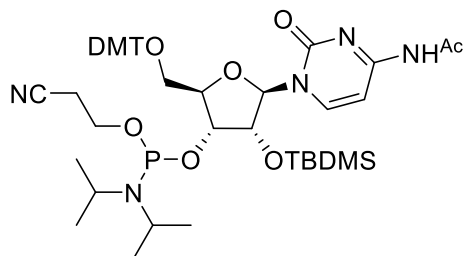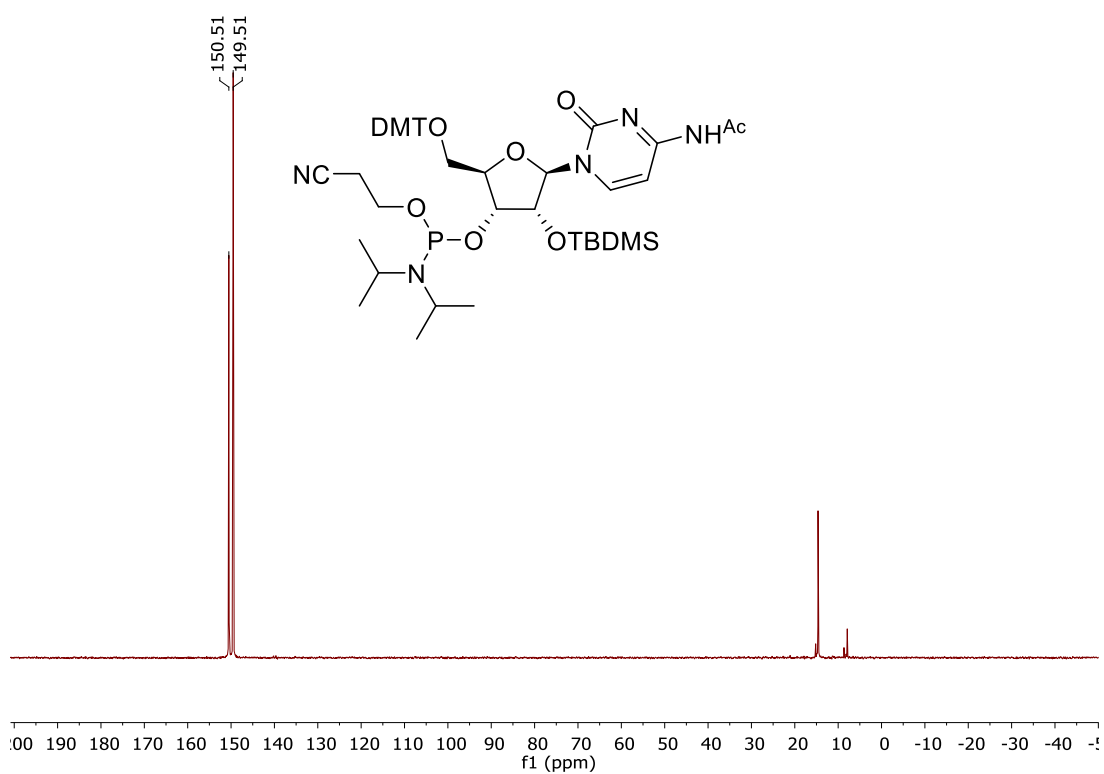

Figure S29.  $^{31}\text{P}$  NMR of DNA phosphoramidite  $\text{C}^{\text{Ac}}$  **31** in  $\text{CDCl}_3$

*N*2-isobutyryl-5'-*O*-(4,4'-dimethoxytrityl)-2'-*O*-*tert*butyl(dimethylsilyl)guanine-3'-*O*-[*O*-(2-cyanoethyl)-*N,N*-diisopropylphosphoramidite (**32**): 44 % yield (with substantial H-phosphonate impurity);  $^{31}\text{P}$  NMR (243 MHz,  $\text{CDCl}_3$   $\delta$  (ppm)): 149.21, 151.18.

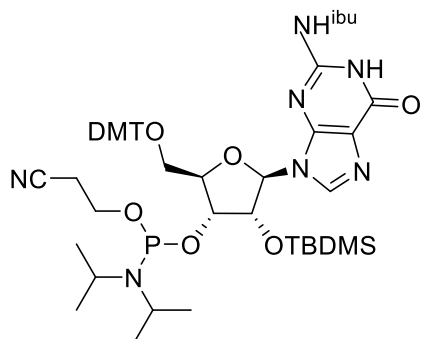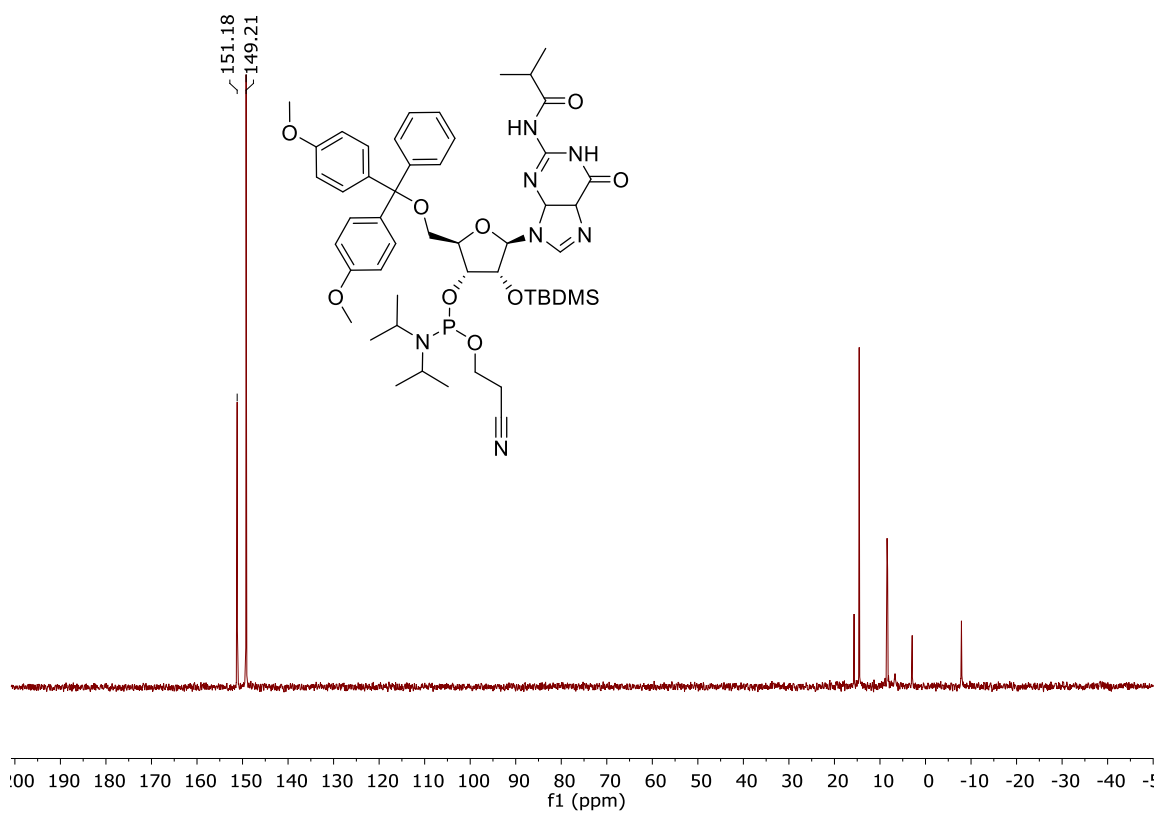

Figure S30.  $^{31}\text{P}$  NMR of RNA phosphoramidite  $\text{G}^{\text{ibu}}$  **32** in  $\text{CDCl}_3$
